# Studying models of balancing selection using phase-type theory

Kai Zeng<sup>\*1</sup>, Brian Charlesworth<sup>†</sup> and Asger Hobolth<sup>‡</sup>

<sup>\*</sup>Department of Animal and Plant Sciences, University of Sheffield, Sheffield S10 2TN, United Kingdom, <sup>†</sup>Institute of Evolutionary Biology, School of Biological Sciences, University of Edinburgh, Edinburgh EH9 3FL, United Kingdom, <sup>‡</sup>Department of Mathematics, Aarhus University, DK-8000 Aarhus C, Denmark

**ABSTRACT** Balancing selection is an important process, which maintains genetic variability in many functionally important genes. To increase our understanding of its effects on patterns of genetic diversity, we analyse two models of long-term balancing selection at a biallelic locus, one with a constant population size and the other with recent population size changes, as well as a model of recent balancing selection. We use time-inhomogeneous phase-type theory to obtain the expected properties of the gene tree at a neutral site linked to the target of selection, and the linkage disequilibrium (LD) between the selected and neutral sites. For long-term balancing selection, we show that selection targets with equilibrium allele frequencies close to 50% are easier to detect than targets with unequal allele frequencies. The target is also easier to identify after a population size reduction. The spread of a new mutation under balancing selection initially produces diversity patterns in linked neutral regions that are similar to those for a selective sweep caused by positive selection, including reduced diversity and an excess of both high and low frequency derived variants, as well as excess LD with the selected locus. Although the effects of recent balancing selection are more subtle, patterns of diversity and LD remain in a non-equilibrium state for a much longer period than with a sweep, and provide complementary information regarding the selection event. These results can be used for developing new methods for detecting loci under balancing selection, and illustrate the power of time-inhomogeneous phase-type theory, which can be applied to a wide range of population genetic problems.

**KEYWORDS** balancing selection; phase-type theory; demographic changes; linkage disequilibrium; site frequency spectrum; selective sweep

Balancing selection refers to a type of natural selection that maintains genetic variability in populations (Fisher 1922; Charlesworth 2006; Fijarczyk and Babik 2015). Genes known to be under balancing selection are often involved in important biological functions. Examples include the major histocompatibility complex (MHC) genes in vertebrates (Spurgin and Richardson 2010), plant self-incompatibility genes (Castric and Vekemans 2004), mating-type genes in fungi (van Diepen *et al.* 2013), genes underlying host-pathogen interactions (Bakker *et al.* 2006; Hedrick 2011), inversion polymorphisms (Dobzhansky 1970), and genes underlying phenotypic polymorphisms in many different organisms (e.g., Johnston *et al.* 2013; Kupper *et al.* 2016; Kim *et al.* 2019). More recently, it has been proposed that a related process, known as associative overdominance, may play a significant role in shaping diversity patterns in ge-

omic regions with very low recombination rates (Becher *et al.* 2020; Gilbert *et al.* 2020). These facts highlight the importance of studying balancing selection.

Understanding how balancing selection affects patterns of genetic variability is a prerequisite for detecting genes under this type of selection. The best studied models involve long-term selection acting at a single locus (Strobeck 1983; Hudson and Kaplan 1988; Takahata 1990; Takahata and Nei 1990; Vekemans and Slatkin 1994; Nordborg 1997; Takahata and Satta 1998; Innan and Nordborg 2003). It is well known that, in addition to maintaining diversity at the selected locus, long-term balancing selection increases diversity at closely linked neutral sites. This reflects an increased coalescence time for the gene tree connecting the alleles in a sample from the current population. When this tree is sufficiently deep, it is possible for the ages of the alleles to exceed the species' age, leading to trans-species polymorphism. Furthermore, long-term balancing selection alters the site frequency spectrum (SFS) at linked neutral sites, causing

doi: 10.1534/genetics.XXX.XXXXXX

Manuscript compiled: Monday 6<sup>th</sup> July, 2020

<sup>†</sup>Corresponding author: Department of Animal and Plant Sciences, University of Sheffield, Sheffield S10 2TN, United Kingdom. Email: k.zeng@sheffield.ac.uk.

1 an excess of intermediate frequency derived variants. These  
2 properties underlie most of the methods used for scanning large-  
3 scale genomic data for targets of balancing selection (Andres  
4 *et al.* 2009; Leffler *et al.* 2013; DeGiorgio *et al.* 2014; Bitarello *et al.*  
5 2018; Cheng and DeGiorgio 2019; Siewert and Voight 2020).

6 Most previous studies have assumed that the population  
7 is at statistical equilibrium under selection, mutation and ge-  
8 netic drift, which is a serious limitation. In reality, most pop-  
9 ulations have experienced recent changes in population size.  
10 There is currently no effective way to make predictions about  
11 the joint effects of demographic changes and balancing selec-  
12 tion on patterns of genetic variability in nearby regions, which  
13 limits our ability to construct methods for analysing data from  
14 these populations. Moreover, many cases of balancing selection  
15 involve variants that have only recently spread to intermediate  
16 frequencies, rather than having been maintained for periods  
17 much greater than the neutral coalescent time (e.g. Eanes 1999;  
18 Kwiatkowski 2005; Corbett-Detig and Hartl 2012). Indeed, re-  
19 cent theoretical studies have suggested that adaptation may  
20 occur through the frequent emergence of short-lived balanced  
21 polymorphism (Sellis *et al.* 2011; Connallon and Clark 2014). Be-  
22 cause of their young age, the characteristic diversity patterns  
23 predicted for long-term balancing selection may not be gener-  
24 ated. As a result, targets of such selection are unlikely to be  
25 detected by existing genome scan methods. This is consistent  
26 with the relatively small number of potential targets returned by  
27 genome scans (Andres *et al.* 2009; Leffler *et al.* 2013; DeGiorgio  
28 *et al.* 2014; Bitarello *et al.* 2018; Cheng and DeGiorgio 2019).

29 Multiple authors have suggested that the emergence of re-  
30 cent balanced polymorphism will generate diversity patterns  
31 that resemble those generated by incomplete selective sweeps  
32 (Charlesworth 2006; Sellis *et al.* 2011; Fijarczyk and Babik 2015),  
33 and methods designed for detecting sweeps can indeed pick  
34 up these signals (e.g., Zeng *et al.* 2006). However, there is cur-  
35 rently no theoretical framework for studying recent balanced  
36 polymorphism and quantifying its effects on diversity patterns  
37 in nearby regions, which precludes a detailed comparison with  
38 incomplete selective sweeps. Acquiring this knowledge will  
39 help us devise methods for distinguishing between these two  
40 forms of selection, which will in turn help us to test hypotheses  
41 about the role of balancing selection in adaptation.

42 Here we tackle these problems by developing and applying  
43 time-inhomogeneous phase-type theory, thus extending a recent  
44 study in which a time-homogeneous version of the theory was  
45 used to study several population genetic models at statistical  
46 equilibrium (Hobolth *et al.* 2019). This method is essentially an  
47 extension of the backwards matrix representation of the struc-  
48 tured coalescent process that has previously been applied to the  
49 analysis of the effects of balancing selection on a linked neutral  
50 site (Nordborg 1997). We prove several useful results under  
51 the time-inhomogeneous framework, and use them to analyse  
52 three models of balancing selection: an equilibrium model of  
53 long-term balancing selection, a model with strong, long-term  
54 balancing selection and changes in population size, and a model  
55 with recent balancing selection. The analysis of the last model  
56 is accompanied by a comparison with a comparable selective  
57 sweep model.

58 For each of these models, we obtain four statistics that are  
59 useful for understanding the effects of selection on diversity  
60 patterns in neutral regions linked to the target of selection. For a  
61 sample of alleles collected from a neutral site, we calculate (1)  
62 the expected pairwise coalescence time, (2) the expected level

of linkage disequilibrium (LD) between the selected locus and  
the focal neutral site, (3) the total branch length of the gene tree,  
and (4) the site frequency spectrum (SFS). Our results extend  
previous studies of the equilibrium model by providing a uni-  
fying framework for obtaining these statistics. The analysis of  
the non-equilibrium models provides useful insights that can  
be used for devising new genome scan methods or parameter  
estimation methods. We conclude the study by discussing the  
usefulness of phase-type theory in population genetics.

## An equilibrium model of balancing selection

Consider a diploid, randomly mating population. The effective  
population size  $N_e$  is assumed to be constant over time. An  
autosomal locus with two alleles  $A_1$  and  $A_2$  is under balancing  
selection. The intensity of selection is assumed to be sufficiently  
strong and constant over time that the frequencies of the two  
alleles remain at their equilibrium values indefinitely. Denote  
the equilibrium frequencies of  $A_1$  and  $A_2$  by  $\hat{p}_1$  and  $\hat{p}_2$ , respec-  
tively ( $\hat{p}_1 + \hat{p}_2 = 1$ ). Note that this set-up can accommodate  
any model of long-term balancing selection (with or without  
reversible mutation between  $A_1$  and  $A_2$ ), as long as it produces  
these equilibrium allele frequencies. Consider a sample of  $n$   
alleles with respect to a linked neutral locus, with a recombina-  
tion frequency  $r$  with the selected locus. In the following four  
subsections, we use time-homogeneous phase-type theory to  
calculate the four statistics mentioned at the end of the Introduc-  
tion. This introduces the methodology and notation, and sets the  
stage for extending the analysis to non-equilibrium models in  
later sections. A similar model has been investigated previously  
using different approaches (Strobeck 1983; Hudson and Kaplan  
1988; Nordborg 1997). However, these do not provide analytical  
expressions for the SFS.

### The mean coalescence time for a sample size of two

Each of the two alleles in the sample is associated with either  $A_1$   
or  $A_2$  at the selected site. The sample is therefore in one of three  
possible states (Figure 1). In state 1, both alleles are associated  
with  $A_2$ . In state 2, one allele is associated with  $A_1$ , and the  
other is associated with  $A_2$ . In state 3, both alleles are associated  
with  $A_1$ . Take state 1 as an example. An allele currently associ-  
ated with  $A_2$  was associated with  $A_1$  in the previous generation  
either because there was an  $A_1$  to  $A_2$  mutation during gamete  
production, or because the parent was an  $A_1A_2$  heterozygote  
and there was a recombination event. Define  $v_{21}$  as the (back-  
ward) mutation rate. The first event occurs with probability  $v_{21}$ ,  
and the second event occurs with probability  $r\hat{p}_1$ . The prob-  
ability that the focal allele becomes associated with  $A_1$  in the  
previous generation is  $m_{21} = v_{21} + r\hat{p}_1$ . The two alleles in state  
1 may share a common ancestor in the previous generation. Be-  
cause the frequency of  $A_2$  is  $\hat{p}_2$ , a total of  $2N_e\hat{p}_2$  alleles were  
associated with  $A_2$  in the previous generation. The chance that  
the two alleles coalesce is  $1/(2N_e\hat{p}_2)$ .

Under the standard assumption that the probability of occur-  
rence of more than one event in one generation is negligible, the  
probability that the two alleles in state 1 remain unchanged for  $z$   
generations is:

$$\left(1 - 2m_{21} - \frac{1}{2N_e\hat{p}_2}\right)^z \approx e^{-\left(2m_{21} + \frac{1}{2N_e\hat{p}_2}\right)z} = e^{-\left(2M_{21} + \frac{1}{\hat{p}_2}\right)t} \quad (1)$$

where  $M_{21} = 2N_em_{21} = \mu_{21} + \rho\hat{p}_1$ ,  $\mu_{21} = 2N_ev_{21}$ ,  $\rho = 2N_er$ ,  
and  $t = z/(2N_e)$ .

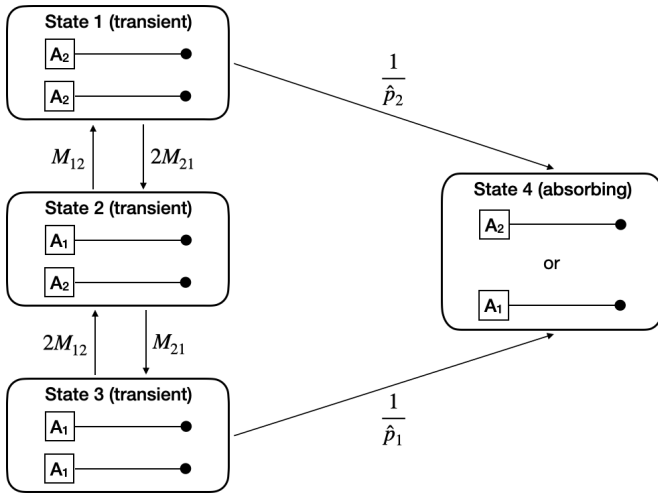

**Figure 1** Transition rates between the states of the equilibrium balancing selection model for a sample size of two. Time is scaled in units of  $2N_e$  generations. The equilibrium frequencies of  $A_1$  and  $A_2$  are  $\hat{p}_1$  and  $\hat{p}_2$ , respectively.  $M_{ij} = \mu_{ij} + \rho\hat{p}_j$ , where  $\mu_{ij} = 2N_e v_{ij}$  and  $\rho = 2N_e r$ . The neutral locus is represented by a black dot.

$\Lambda \vec{1} = \vec{0}$ , where  $\vec{1}$  is a vector of ones and  $\vec{0}$  is a vector of zeros.

We can write  $\Lambda$  in a more compact form:

$$\Lambda = \begin{bmatrix} S & s \\ \vec{0} & 0 \end{bmatrix} \quad (3)$$

where  $S$  represents the 3-by-3 sub-matrix in the upper left corner of  $\Lambda$ , and  $s^T = (\frac{1}{\hat{p}_2}, 0, \frac{1}{\hat{p}_1})$  consists of the first three elements in the last column of  $\Lambda$ . Thus,  $S$  contains the transition rates between the transient states, and  $s$  contains the rates of jumping to the absorbing state.  $S$  and  $s$  are referred to as the sub-intensity matrix and the exit rate vector, respectively.

Let  $T_{i,2-i}$  be the expected time to the MRCA, given that  $i$  and  $2-i$  alleles in the sample are associated with  $A_1$  and  $A_2$ , respectively. Let the initial condition vector be  $\alpha = (\alpha_1, \alpha_2, \alpha_3)$ , where  $\alpha_i$  is the probability that the sample is in state  $i$  ( $\sum_{i=1}^3 \alpha_i = 1$ ). For example, if the sample is in state 1, then  $\alpha = (1, 0, 0)$ ; using phase-type theory (Hobolth et al. 2019), we have:

$$T_{0,2} = \alpha \mathbf{U} \vec{1} = \sum_{k=1}^3 u_{1k} \quad (4)$$

where  $\mathbf{U} = \{u_{ij}\} = -S^{-1}$ , and  $u_{ij}$  gives us the expected amount of time the process spends in state  $j$  prior to coalescence, provided that the initial state is  $i$  ( $i, j \in \{1, 2, 3\}$ ).

$\mathbf{U}$  is referred to as the Green's matrix. By changing  $\alpha$ , we can obtain all the  $T_{i,2-i}$  without the need to recalculate  $\mathbf{U}$ . More generally, we can use phase-type theory to obtain the probability density function and all the moments of the coalescence time (Hobolth et al. 2019). It is possible to obtain  $\mathbf{U}$  analytically for the general model with reversible mutation between  $A_1$  and  $A_2$ , as specified by (2). However, its terms are complicated, and are not shown. For sites that are not very tightly linked to the selected locus, movements of lineages between the two allelic classes are primarily driven by recombination (i.e.,  $\rho \gg \mu_{ij}$ ). Furthermore, with only two alleles at the selected locus, the general model is most appropriate for cases where the selected locus contains a small handful of nucleotides. In this case  $\mu_{ij}$  is of the order of the average nucleotide diversity at neutral sites (e.g., about 0.02 in *Drosophila melanogaster* or about 0.001 in humans).

For most applications, therefore, it is sufficient to work with a simplified model with  $\mu_{ij} = 0$ . In this case, we have  $\hat{p}_1 M_{12} = \hat{p}_2 M_{21}$  (i.e., there is conservative migration; Nagylaki (1980)), which leads to:

$$\mathbf{U} = \begin{bmatrix} \frac{\hat{p}_2 + 2\hat{p}_1 \hat{p}_2 \rho}{1 + 2\hat{p}_1 \hat{p}_2 \rho} & 2\hat{p}_1 \hat{p}_2 & \frac{2\hat{p}_1^3 \hat{p}_2 \rho}{1 + 2\hat{p}_1 \hat{p}_2 \rho} \\ \hat{p}_2^2 & 2\hat{p}_1 \hat{p}_2 + \frac{1}{\rho} & \hat{p}_1^2 \\ \frac{2\hat{p}_1 \hat{p}_2^3 \rho}{1 + 2\hat{p}_1 \hat{p}_2 \rho} & 2\hat{p}_1 \hat{p}_2 & \frac{\hat{p}_1 + 2\hat{p}_1^3 \hat{p}_2 \rho}{1 + 2\hat{p}_1 \hat{p}_2 \rho} \end{bmatrix}. \quad (5)$$

Summing the three rows, we have:

$$\begin{cases} T_{0,2} = 1 - \frac{\hat{p}_1(\hat{p}_1 - \hat{p}_2)}{1 + 2\hat{p}_1 \hat{p}_2 \rho} \\ T_{1,1} = 1 + \frac{1}{\rho} \\ T_{2,0} = 1 + \frac{(\hat{p}_1 - \hat{p}_2)\hat{p}_2}{1 + 2\hat{p}_1 \hat{p}_2 \rho} \end{cases} \quad (6)$$

These results are the same as those derived by Nordborg (1997). The additional insight obtained here is given by (5). For instance, regardless of whether the initial state is 1 or 3, the process spends, on average, an equal amount of time in state 2 before coalescence (i.e.,  $u_{12} = u_{32}$  in (5)). The results presented

1 We have scaled time in units of  $2N_e$  generations, and will use  
 2 this convention throughout unless stated otherwise. Using this  
 3 timescale, when in state 1, the waiting time to the next event  
 4 follows an exponential distribution with rate parameter  $2M_{21} +$   
 5  $(1/\hat{p}_2)$ . Given that an event has occurred, it is either caused  
 6 by one of the two alleles becoming associated with  $A_1$  with  
 7 probability  $2M_{21}/(2M_{21} + 1/\hat{p}_2)$ , or by coalescence of the two  
 8 alleles with probability  $(1/\hat{p}_2)/(2M_{21} + 1/\hat{p}_2)$ . As illustrated  
 9 in Figure 1, the first possibility moves the process from state 1  
 10 to state 2, whereas the second possibility terminates the process  
 11 by moving it into the absorbing state where the most recent  
 12 common ancestor (MRCA) is reached (state 4).

13 We can derive the transition rates between all four states  
 14 of the process using similar arguments (Figure 1). This model  
 15 is analogous to a two-deme island model in which  $2N_e \hat{p}_1$  and  
 16  $2N_e \hat{p}_2$  are the sizes of the two demes, and  $M_{12}$  and  $M_{21}$   
 17 are scaled (backward) migration rates (e.g., Slatkin 1991; Nordborg  
 18 1997). Hereafter, we refer to the sub-population consisting of al-  
 19 leles associated with  $A_1$  or  $A_2$  as allelic class 1 or 2, respectively.

We can analyse this model efficiently using time-homogeneous phase-type theory (Hobolth et al. 2019). To this end, we define an intensity (rate) matrix as:

$$\Lambda = \begin{bmatrix} -2M_{21} - \frac{1}{\hat{p}_2} & 2M_{21} & 0 & \frac{1}{\hat{p}_2} \\ M_{12} & -M_{12} - M_{21} & M_{21} & 0 \\ 0 & 2M_{12} & -2M_{12} - \frac{1}{\hat{p}_1} & \frac{1}{\hat{p}_1} \\ 0 & 0 & 0 & 0 \end{bmatrix}. \quad (2)$$

20 The first three rows in  $\Lambda$  are for states 1, 2, and 3, respectively.  
 21 In row  $i$  ( $i \in \{1, 2, 3\}$ ), the  $j$ -th element is the rate of jumping  
 22 from state  $i$  to state  $j$  ( $j \neq i$  and  $j \in \{1, 2, 3, 4\}$ ), and the diagonal  
 23 element is the negative of the sum of all the other elements in  
 24 this row. All elements of the last row of  $\Lambda$  are zero because state  
 25 4 is absorbing, so that the rate of leaving it is zero. Note that

1 in Figure S1 further confirm that the simplified model should suffice  
2 in most cases, because the general model converges quickly  
3 to the simplified model.

4 Let  $\pi_{i,2-i}$  be the expected diversity when  $i$  and  $2-i$  alleles in  
5 the sample are associated with  $A_1$  and  $A_2$ , respectively. Under  
6 the infinite sites model (Kimura 1969),  $\pi_{i,2-i} = 2\theta T_{i,2-i}$ , where  
7  $\theta = 2N_e v$  and  $v$  is the mutation rate per generation at the neutral  
8 site. From (6), we can see that  $T_{1,1}$  is independent of  $\hat{p}_1$  and  $\hat{p}_2$ ,  
9 and is always greater than 1, which is the expected coalescence  
10 time under the standard neutral model with constant population  
11 size. Note also that  $T_{0,2}$  is  $< 1$  or  $> 1$  when  $\hat{p}_2$  is  $< 0.5$  or  $> 0.5$ .  
12 Similarly,  $T_{2,0}$  is  $< 1$  or  $> 1$  when  $\hat{p}_1$  is  $< 0.5$  or  $> 0.5$ . These  
13 trends hold even when there is reversible mutation between  $A_1$   
14 and  $A_2$  (Figure S1).

In reality, the selected variants are often unknown, and detection of targets of balancing selection typically relies on investigating how diversity levels change along the chromosome (Charlesworth 2006; Fijarczyk and Babik 2015). It is therefore useful to consider the expected coalescence time for two randomly sampled alleles at the neutral site, defined as:

$$T = \hat{p}_1^2 T_{2,0} + 2\hat{p}_1 \hat{p}_2 T_{1,1} + \hat{p}_2^2 T_{0,2} = 1 + \frac{\hat{p}_1 \hat{p}_2 (\rho + 2)}{\rho(1 + 2\hat{p}_1 \hat{p}_2 \rho)} \quad (7)$$

15 where the results in (6) are used. The nucleotide site diversity  
16 is given by  $\pi = 2T\theta$ . Figure 2 shows that the diversity level  
17 is highest when  $\hat{p}_1 = \hat{p}_2 = 0.5$ . This is also true when there  
18 is reversible mutation between  $A_1$  and  $A_2$  (Figure S2). The  
19 simplified model is inherently symmetrical. For example, the  
20 curve for  $\hat{p}_1 = 0.25$  is identical to that for  $\hat{p}_1 = 0.75$ . These  
21 results suggest that targets of balancing selection are easiest to  
22 detect when the equilibrium frequencies of the selected variants  
23 are close to 50%. In all cases, marked effects on diversity are  
24 only seen with  $\rho$  of order 1 or less.

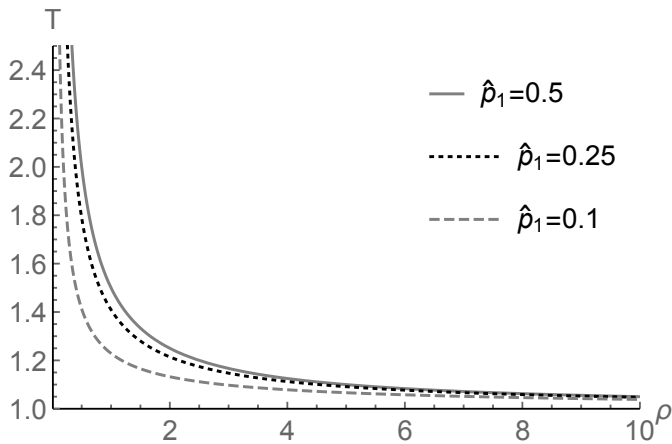

**Figure 2** The expected pairwise coalescence time as a function of  $\rho$ . The simplified model with  $\mu_{12} = \mu_{21} = 0$  is considered.  $\hat{p}_1$  is the equilibrium frequency of  $A_1$  at the selected locus.

#### 25 LD between the selected locus and a linked neutral site

The expected pairwise coalescence time obtained in the previous section can be used to calculate a measure of LD between the two loci (Charlesworth *et al.* 1997). Assume that the neutral locus is segregating for two variants  $B_1$  and  $B_2$ . Let the frequencies of  $B_1$  in allelic class 1 and 2 be  $x$  and  $y$ , respectively. Thus, the frequency of  $B_1$  in the population is  $q_1 = \hat{p}_1 x + \hat{p}_2 y$ , and that of

$B_2$  is  $q_2 = 1 - q_1$ . Let  $\delta = x - y$ . The coefficient of LD between the two loci is given by  $D = \hat{p}_1 \hat{p}_2 \delta$  (see Chap. 8 of Charlesworth and Charlesworth 2010, p. 410). The corresponding correlation coefficient is  $R^2 = D^2 / (\hat{p}_1 \hat{p}_2 q_1 q_2)$ . It is impossible to derive a simple expression for  $\mathbb{E}[R^2]$ . An alternative that has been widely used can be written as:

$$\sigma^2 = \frac{\mathbb{E}[D^2]}{\mathbb{E}[\hat{p}_1 \hat{p}_2 q_1 q_2]} = \frac{\hat{p}_1^2 \hat{p}_2^2 \mathbb{E}[\delta^2]}{\hat{p}_1 \hat{p}_2 \mathbb{E}[q_1 q_2]} = \frac{\hat{p}_1 \hat{p}_2 \mathbb{E}[\delta^2]}{\mathbb{E}[q_1 q_2]} \quad (8)$$

where we have used the fact that  $\hat{p}_1$  and  $\hat{p}_2$  are assumed to be constant (Ohta and Kimura 1971; Strobeck 1983; McVean 2002). Note that  $\pi = 2\mathbb{E}[q_1 q_2]$  is the expected diversity at the neutral site.

As discussed in the previous section, we have  $\pi = 2\theta T$  under the infinite sites model. To relate  $\mathbb{E}[\delta^2]$  to the expected pairwise coalescence times, we first define the expected diversity within allelic class 1 and allelic class 2 as  $\pi_{A1} = 2\mathbb{E}[x(1-x)]$  and  $\pi_{A2} = 2\mathbb{E}[y(1-y)]$ , respectively. Again, under the infinite sites model, we have  $\pi_{A1} = 2\theta T_{2,0}$  and  $\pi_{A2} = 2\theta T_{0,2}$ . In addition, let the weighted within allelic class diversity be  $\pi_A = \hat{p}_1 \pi_{A1} + \hat{p}_2 \pi_{A2}$ . Note that  $\pi - \pi_A = 2\mathbb{E}[q_1 q_2 - \hat{p}_1 x(1-x) - \hat{p}_2 y(1-y)] = 2\hat{p}_1 \hat{p}_2 \mathbb{E}[\delta^2]$ . Inserting these results into right-most term of (8), we have:

$$\sigma^2 = \frac{\pi - \pi_A}{\pi} = \frac{T - T_A}{T} \quad (9)$$

where  $T_A = \hat{p}_1 T_{2,0} + \hat{p}_2 T_{0,2}$  is the weighted average within allelic class coalescence time. Note that  $\sigma^2$  has the same form as the fixation indices (e.g.,  $F_{ST}$ ) widely used in studies of structured populations. This close relationship between LD and the fixation indices was first pointed out by Charlesworth *et al.* (1997), who referred to  $\sigma^2$  as  $F_{AT}$ . Our treatment here clarifies the relevant statements in this previous study. It also provides a genealogical interpretation of the results of Strobeck (1983).

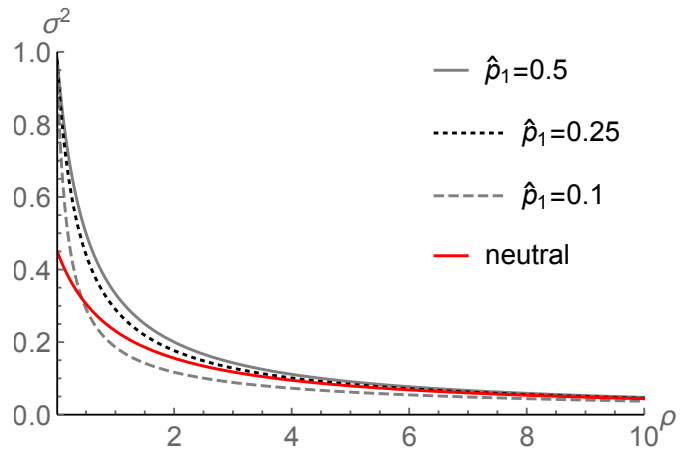

**Figure 3** The level of LD between the selected and neutral loci as a function of  $\rho$ . The simplified model with  $\mu_{12} = \mu_{21} = 0$  is considered. The neutral expectation for  $\sigma^2$  is also included.

Figure 3 shows  $\sigma^2$  as a function of  $\rho$  generated under the simplified model with  $\mu_{12} = \mu_{21} = 0$ . The level of LD between the selected and neutral loci is highest when  $\hat{p}_1 = \hat{p}_2 = 0.5$ , and decreases as  $\hat{p}_1$  moves close to either 0 or 1 (note that the model is symmetrical such that, for  $0 < z < 1$ , the curve for  $\hat{p}_1 = z$  is identical to that for  $\hat{p}_1 = 1 - z$ ). As expected, reversible mutation between  $A_1$  and  $A_2$  lowers LD by increasing the rate at

1 which lineages move between the two allelic classes (Figure S3).  
 2 These results mirror those described above for diversity levels.  
 3 Together they show that the effect of balancing selection on  
 4 linked diversity and LD patterns is largest when the equilibrium  
 5 frequencies of the selected variants are close to 50%.

6 It is informative to compare LD patterns under balancing  
 7 selection with those under neutrality (i.e.,  $\sigma^2 = (5 + \rho)/(11 +$   
 8  $13\rho + 2\rho^2)$ ; Ohta and Kimura 1971). With balancing selection  
 9 and  $\hat{p}_1 = 0.5$ , elevated LD is observed when  $\rho < 4$  (Figure  
 10 3). With  $\hat{p}_1 = 0.1$ , LD is higher than neutral expectation when  
 11  $\rho < 0.5$ , and it becomes lower than the neutral level when  
 12  $\rho > 0.5$ . Considering crossover alone, the scaled recombination  
 13 rate per site is of the order of 0.002 in humans, and 0.02 in  
 14 *Drosophila*. These values go up substantially if we also take  
 15 into account gene conversion (e.g., Campos and Charlesworth  
 16 2019). Thus, even when the effect of balancing selection is at its  
 17 maximum, the region affected is small. The effect becomes rather  
 18 insubstantial when the equilibrium frequency is close to 0 or 1,  
 19 suggesting that such selection targets are probably extremely  
 20 difficult to detect.

### 21 Total branch length

22 We now consider the situation when a sample of  $n$  alleles is  
 23 available, with  $n_1$  of them associated with  $A_1$  and  $n_2$  with  $A_2$   
 24 ( $n_1 + n_2 = n$ ). Let  $L_{n_1, n_2}$  be the the expected total branch length  
 25 of the gene tree that describes the ancestry of the sample with  
 26 respect to a neutral site linked to the selected locus. Under the  
 27 infinite sites model, the expected number of segregating sites in  
 28 the sample is given by  $\theta L_{n_1, n_2}$ . Thus,  $L_{n_1, n_2}$  is closely related to  
 29 Watterson's  $\theta_W$  (Watterson 1975) and Tajima's  $D$  (Tajima 1989),  
 30 both of which are frequently used in the search for selection  
 31 targets (Charlesworth 2006; Fijarczyk and Babik 2015). There  
 32 are also other ways in which  $L_{n_1, n_2}$  can be used for detecting  
 33 balancing selection (DeGiorgio et al. 2014).

34 For the case with two alleles considered above, the expected  
 35 total branch length is simply  $2T_{i,2-i}$ . Consider a sample size  
 36 of three. It can be in one of four possible states, with states 1,  
 37 2, 3, and 4 corresponding to situations where 0, 1, 2, and 3 of  
 38 the sampled alleles are associated with  $A_1$ . Going backwards in  
 39 time, the coalescent process can move between these states via  
 40 recombination or mutation between allelic classes. For instance,  
 41 in state 1 all three alleles are associated with  $A_2$ , and the process  
 42 moves to state 2 at rate  $3M_{21}$ . When there is more than one allele  
 43 in the same allelic class, coalescence may occur. Again, take state  
 44 1 as an example. There are three alleles in allelic class 2, so that  
 45 the rate of coalescence is  $\binom{3}{2}/\hat{p}_2 = 3/\hat{p}_2$ . A coalescent event  
 46 moves the process to one of the three transient states depicted  
 47 in Figure 1, referred to as states 5, 6, and 7 here. The transition  
 48 rates between these states, as well as the rates of entering the  
 49 absorbing state (i.e., the MRCA), are identical to those discussed  
 50 above (i.e., (2)).

A diagram showing the transition rates between the states  
 in this model can be found in Figure S4. The intensity matrix  
 $\Lambda$  for this model can be defined in the same way as described  
 above, and is displayed in Supplementary Text S.1.  $\Lambda$  has a block  
 structure:

$$\Lambda = \begin{bmatrix} S_3 & S_{32} & \underline{0} \\ \underline{0} & S_2 & s_2 \\ \underline{\vec{0}} & \underline{\vec{0}} & 0 \end{bmatrix} \quad (10)$$

51 where  $\underline{0}$  is a matrix of zeros.  $S_3$  is a 4-by-4 matrix and contains

the transition rates between states 1 - 4, all with three alleles.  $S_{32}$   
 is a 4-by-3 matrix and contains the rates of coalescent events that  
 move the process from a state with three alleles to one with only  
 two alleles (i.e., from states 1 - 4 to states 5 - 7). Finally,  $S_2$  and  $s_2$   
 are the same as the corresponding elements defined in (3). The  
 sub-intensity matrix  $S$  is the 7-by-7 sub-matrix in the upper left  
 corner of  $\Lambda$ , and contains the transition rates between all the  
 transient states.

Taking advantage of the block structure, we can calculate the  
 Green's matrix efficiently as:

$$\mathbf{U} = -\mathbf{S}^{-1} = - \begin{bmatrix} S_3 & S_{32} \\ \underline{0} & S_2 \end{bmatrix}^{-1} = \begin{bmatrix} -S_3^{-1} & S_3^{-1}S_{32}S_2^{-1} \\ \underline{0} & -S_2^{-1} \end{bmatrix}. \quad (11)$$

Recall that  $\mathbf{U} = \{u_{ij}\}$  and  $u_{ij}$  is the expected amount of  
 time the process spends in (transient) state  $j$  prior to reaching the  
 MRCA, provided that the initial state is  $i$ . If, for instance,  
 we want to calculate  $L_{0,3}$ , we first note that the sample is in  
 state 1. The process spends, on average,  $\sum_{j=1}^4 u_{1j}$  in states 1 - 4.  
 Because these states have three alleles, the coalescent genealogy  
 must have three lineages. Thus, these four states contribute  
 $3 \sum_{j=1}^4 u_{1j}$  to  $L_{0,3}$ . Similarly, states 5 - 7, which contain two alleles,  
 contribute  $2 \sum_{k=5}^7 u_{1k}$ . Putting these together, we have:

$$L_{0,3} = 3 \sum_{j=1}^4 u_{1j} + 2 \sum_{k=5}^7 u_{1k}. \quad (12)$$

More generally, if the sample is in state  $i$ , we can define the  
 initial condition vector as  $\alpha = e_i$ , where  $i \in \{1, 2, 3, 4\}$  and  $e_i$  is a  
 1-by-7 vector whose elements are 0 except that the  $i$ -th element  
 is 1. If we further define  $D^T = (3, 3, 3, 3, 2, 2, 2)$ , we have:

$$L_{i,3-i} = \alpha \mathbf{U} \mathbf{D}. \quad (13)$$

As we will see later, expressing the results this way allows us  
 to accommodate non-equilibrium situations.  $D$  is known as  
 the reward vector, and we can use phase-type theory to obtain  
 the distribution and all the moments of the total branch length  
 (Hobolth et al. 2019).

The approach can be easily extended to an arbitrary sample  
 size  $n$ . As discussed above (see (7)), for data analysis, it is useful  
 to consider the expected total branch length for a random sample  
 of size  $n$ , defined as:

$$L = \sum_{i=0}^n \binom{n}{i} \hat{p}_1^i \hat{p}_2^{n-i} L_{i,n-i}. \quad (14)$$

In Figure 4, we display  $L$  for several combinations of sample  
 sizes and variant frequencies at the selected locus. To make the  
 diversity-elevating effect more visible, we divide  $L$  by its neutral  
 expectation (i.e.,  $2 \sum_{i=1}^{n-1} \frac{1}{i}$ ). It is evident that, as  $n$  becomes larger,  
 the sensitivity of  $L$  to  $\hat{p}_1$  decreases, to the extent that, when  $n =$   
 $30$ ,  $L$  is effectively independent of  $\hat{p}_1$ . In addition, the strongest  
 signal of elevated diversity appears when  $n = 2$  and  $\hat{p}_1 = 0.5$ ,  
 but becomes less pronounced as  $n$  increases. To interpret these  
 observations, recall that, when  $n = 2$ ,  $\pi = \theta L$ , whereas for larger  
 $n$ ,  $\theta L$  is the expected number of segregating sites in the sample,  
 denoted by  $S$ . In data analysis, the nucleotide site diversity  $\pi$  is  
 typically estimated from samples containing many alleles, and  
 is known to be most sensitive to intermediate frequency variants  
 (Tajima 1989). On the other hand,  $S$  is determined primarily  
 by low frequency variants in the sample. Thus, these results

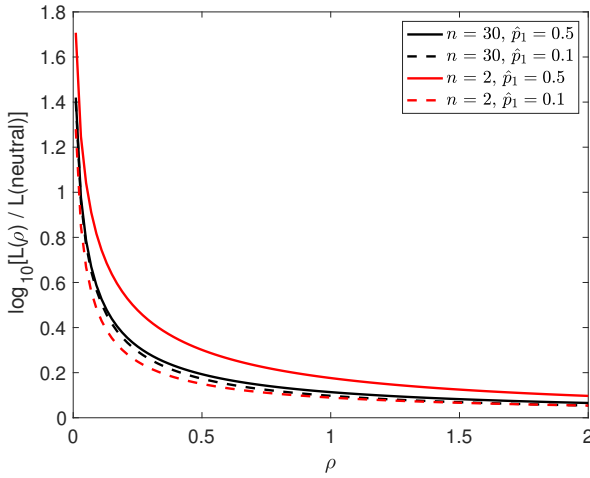

**Figure 4** The expected total branch length  $L$  for several combinations of sample size ( $n$ ) and equilibrium frequency of the selected variant  $A_1$  ( $\hat{p}_1$ ). The value of  $L$  under balancing selection is divided by its neutral expectation. The y-axis is on the  $\log_{10}$  scale.

1 suggest that  $S$  is less informative about balancing selection than  
 2  $\pi$ . However, the contrast between  $S$  and  $\pi$  can be used as an  
 3 index of the departure of the SFS from its expectation at neutral  
 4 equilibrium (Tajima 1989). This clearly points to the importance  
 5 of considering SFS, which is done in the next subsection.

6 This way of obtaining the total branch length is an alterna-  
 7 tive to the recursion method used in previous studies (Hudson  
 8 and Kaplan 1988; DeGiorgio *et al.* 2014). The advantage of the  
 9 current approach is that it can be extended to accommodate  
 10 non-equilibrium dynamics such as population size changes and  
 11 recent selection (see below). The dimension of the sub-intensity  
 12 matrix  $S$  is now  $d = (n+1) + n + \dots + 3 = \frac{1}{2}(n-1)(n+4)$ . The  
 13 numerical complexity increases rapidly because numerical matrix  
 14 inversion requires  $O(d^3)$  operations. However, by making  
 15 use of the block structure (e.g., (11)), the number of operations is  
 16 reduced to  $O((n+1)^3)$ . Thus, this approach is computationally  
 17 feasible for samples of several hundred alleles.

### 18 The site frequency spectrum (SFS)

19 Again, consider a sample of  $n$  alleles at the neutral site, with  $n_1$   
 20 and  $n_2$  of them associated with  $A_1$  and  $A_2$ , respectively. The  
 21  $i$ -th element of the SFS is defined as the expected number of  
 22 segregating sites where the derived variant appears  $i$  times in  
 23 the sample ( $0 < i < n$ ). Note that this definition is different from  
 24 the standard definition for a panmictic population in that it is  
 25 conditional on  $n_1$  and  $n_2$ . Consider the gene tree for the sample.  
 26 We refer to a lineage (branch) that is ancestral to  $i$  alleles in  
 27 the sample as a lineage of size  $i$  ( $0 < i < n$ ). Under the infinite sites  
 28 model, mutations on a lineage of size  $i$  segregate at frequency  
 29  $i$  in the sample. Let  $\phi_i^{(n_1, n_2)}$  be the expected total length of all  
 30 lineages of size  $i$  in the gene tree. The SFS under the infinite sites  
 31 model can be expressed as  $X_i^{(n_1, n_2)} = \theta \phi_i^{(n_1, n_2)}$  (e.g., Polanski  
 32 and Kimmel 2003). We can calculate  $\phi_i^{(n_1, n_2)}$  using phase-type  
 33 theory with additional book keeping.

34 To illustrate the calculation, consider a sample of three alleles.  
 35 Going backwards in time, before the first coalescent event, all  
 36 the lineages are size one. After the first coalescent event, one

**Table 1** The transient states for a sample size of three

| ID | state        | ID | state        | ID | state        | ID | state        |
|----|--------------|----|--------------|----|--------------|----|--------------|
| 1  | (0, 0, 3, 0) | 2  | (1, 0, 2, 0) | 3  | (2, 0, 1, 0) | 4  | (3, 0, 0, 0) |
| 5  | (0, 0, 1, 1) | 6  | (1, 0, 0, 1) | 7  | (0, 1, 1, 0) | 8  | (1, 1, 0, 0) |

lineage is size two, and the other is size one. Thus, the transient  
 states of the coalescent process can be represented by 4-tuples of  
 the form  $(a_{1,1}, a_{1,2}, a_{2,1}, a_{2,2})$  where  $a_{i,j}$  is the number of lineages  
 of size  $j$  that are currently associated with  $A_i$ . We have listed  
 all the transient states in Table 1. The first four states contain  
 three lineages, and the last four contain two lineages. We can  
 determine the transition rates between the states using the same  
 arguments that lead to Figures 1 and S4; the intensity matrix  
 $\Lambda$  is displayed in Supplementary Text S.2. Note that  $\Lambda$  has the  
 same form as (10), so that we can obtain  $U$  using (11).

As an example, if  $n_1 = 2$  and  $n_2 = 1$ , the starting state is 3,  
 so that only the elements in the third row of  $U$  are relevant. Be-  
 cause states 1 - 4 contain three size one lineages, they contribute  
 $3 \sum_{i=1}^4 u_{3i}$  to  $\phi_1^{(2,1)}$ , but nothing to  $\phi_2^{(2,1)}$ . The last four states  
 contain one size one lineage and one size two lineage. Thus,  
 they contribute  $\sum_{k=5}^8 u_{3k}$  to both  $\phi_1^{(2,1)}$  and  $\phi_2^{(2,1)}$ . Putting these  
 results together, we have:

$$\begin{cases} \phi_1^{(2,1)} = 3 \sum_{i=1}^4 u_{3i} + \sum_{k=5}^8 u_{3k} \\ \phi_2^{(2,1)} = \sum_{i=1}^4 u_{3i} \end{cases} \quad (15)$$

Define the initial condition vector  $\alpha = (0, 0, 1, 0, 0, 0, 0, 0)$ ,  
 $\phi^{(2,1)} = (\phi_1^{(2,1)}, \phi_2^{(2,1)})$  and

$$D^T = \begin{bmatrix} 3 & 3 & 3 & 3 & 1 & 1 & 1 & 1 \\ 0 & 0 & 0 & 0 & 1 & 1 & 1 & 1 \end{bmatrix}. \quad (16)$$

We have  $\mathbb{E}[\phi^{(2,1)}] = \alpha U D$ , which has the same form as (13)  
 and will be useful below when non-equilibrium dynamics are  
 introduced.

We can obtain the other  $\phi^{(i,3-i)}$  by defining the appropriate  
 $\alpha$ . In addition to the mean, it is also possible to use phase-  
 type theory to obtain the variance of the SFS, as well as the  
 covariance between different elements of the SFS (Hobolth *et al.*  
 2019). These results are applicable to any sample size  $n \geq 2$ .  
 We defer showing results regarding the SFS until a later section  
 where a model of recent balancing selection is analysed.

Obtaining the SFS with the phase-type approach has been  
 shown to be numerically more stable and accurate than ap-  
 proaches that rely on solving the diffusion equation numerically  
 (Kern and Hey 2017). However, a limitation is that the size of  
 the state space increases rapidly with  $n$  (Andersen *et al.* 2014).  
 This is true even after exploiting the block structure of the sub-  
 intensity matrix  $S$ . For instance, when  $n = 16$ , the dimension of  
 the largest sub-matrix in  $S$  is 922, but it increases to 3493 when  
 $n = 20$ . However, the flexibility of phase-type theory, especially  
 its ability to accommodate complex non-equilibrium models,  
 makes it a useful tool, as we show next.

### A model with strong balancing selection and changes in population size

So far we have only considered a model of balancing selection at  
 statistical equilibrium. In this section, we switch our attention to

1 a non-equilibrium model in which the population size changes  
 2 in a stepwise manner. Specifically, we consider a diploid, ran-  
 3 domly mating population. Looking back in time, its evolution-  
 4 ary history consists of  $H$  non-overlapping epochs, such that the  
 5 effective population size is  $N_{e,h}$  in epoch  $h$  ( $h \in \{1, 2, \dots, H\}$ ).  
 6 The duration of epoch  $h$  is  $[t_{h-1}, t_h)$ , where  $t_0 = 0$  (the present)  
 7 and  $t_H = \infty$ . Thus, epoch  $H$ , the most ancestral epoch, has  
 8 an infinite time span, over which the population is at statisti-  
 9 cal equilibrium. We assume that an autosomal locus is under  
 10 balancing selection in epoch  $H$ , with two alleles  $A_1$  and  $A_2$  at  
 11 equilibrium frequencies  $\hat{p}_1$  and  $\hat{p}_2$ , respectively. Based on the  
 12 results shown in the previous sections, we only consider the  
 13 simplified model without reversible mutation between  $A_1$  and  
 14  $A_2$ . In addition, we assume that selection is sufficiently strong,  
 15 and the changes in population size are sufficiently small, that  
 16 the frequencies of the two alleles remain at  $\hat{p}_1$  and  $\hat{p}_2$  in the more  
 17 recent epochs. A similar approach has been applied successfully  
 18 to modelling the joint effects of background selection and demo-  
 19 graphic changes (Zeng 2013; Nicolaisen and Desai 2013; Zeng  
 20 and Corcoran 2015).

21 As before, consider a neutral site linked to the selected loc-  
 22 us, with a sample of  $n$  alleles, of which  $n_1$  and  $n_2$  are associated  
 23 with  $A_1$  and  $A_2$ , respectively. Consider the expected total branch  
 24 length,  $L_{n_1, n_2}$ . Here time is scaled in units of  $2N_{e,1}$  generations  
 25 (twice the effective population size in the current epoch). We  
 26 first note that the current model has the same states as the equi-  
 27 librium model analysed above (e.g., see Figure S4 for  $n = 3$ ). The  
 28 main difference between the two models lies in the transition  
 29 rates between states.

We define the scaled recombination rate as  $\rho = 2N_{e,1}r$ . The  
 rate at which an allele in allelic class  $i$  moves to allelic class  $j$  is  
 $M_{ij} = \rho \hat{p}_j$ . These have the same form as above (cf. Figure 1). In  
 epoch  $h$ , the total number of alleles associated with  $A_1$  in the  
 population is  $2N_{e,h}\hat{p}_1$ . The probability that two alleles associ-  
 ated with  $A_1$  in the current generation coalesce in the previous  
 generation is  $1/(2N_{e,h}\hat{p}_1)$ . In other words, the probability that  
 they remain un-coalesced for  $z$  generations is:

$$\left(1 - \frac{1}{2N_{e,h}\hat{p}_1}\right)^z \approx \exp\left\{-\frac{z}{2N_{e,h}\hat{p}_1}\right\} = \exp\left\{-\frac{g_h}{\hat{p}_1}t\right\} \quad (17)$$

30 where  $g_h = N_{e,1}/N_{e,h}$  and  $t = z/(2N_{e,1})$ . Thus, the coalescent  
 31 rate between a pair of alleles in allelic class 1 is  $g_h/\hat{p}_1$  in epoch  
 32  $h$ . Similarly, the rate for two alleles in allelic class 2 is  $g_h/\hat{p}_2$ .

33 In epoch  $h$ , the transition rates between the states are constant,  
 34 and we can define an associated sub-intensity matrix,  $S_h$ .  
 35 We have already noted that the states in the current model are  
 36 the same as those in the equilibrium model. The only difference  
 37 is that time is now in units of  $2N_{e,1}$  generations. Thus, we can  
 38 obtain  $S_h$  by simply replacing  $\rho$  and  $1/\hat{p}_i$  in the sub-intensity ma-  
 39 trix for the equilibrium model (e.g., (10); see also Supplementary  
 40 Text S.1) by the newly defined equivalents  $\rho$  and  $g_h/\hat{p}_i$ .

41 Overall, the model has the following parameters:  $\hat{p}_1$ ,  $\rho$ ,  $t_1$ ,  
 42  $g_1$ ,  $t_2$ ,  $g_2$ , ...,  $t_{H-1}$ ,  $g_{H-1}$ , and  $g_H$ . Among these,  $\hat{p}_1$  and  $\rho$  are  
 43 shared across all the epochs, whereas epoch  $h$  has two epoch-  
 44 specific parameters  $t_h$  and  $g_h$  (note that  $t_H = \infty$ ). We have  $H$   
 45 sub-intensity matrices:  $S_1, S_2, \dots, S_H$ . In Supplementary Text S.3,  
 46 we introduce time-inhomogeneous phase-type theory and prove  
 47 the following result:

**Theorem 1.** Consider a continuous time Markov chain with finite  
 state space  $\{1, 2, \dots, K, K+1\}$ , where states  $1, \dots, K$  are transient, and  
 state  $K+1$  is absorbing. Assume that the time interval  $[0, \infty)$  is  
 subdivided into  $H$  non-overlapping epochs. The duration of epoch  $h$  is

$[t_{h-1}, t_h)$ , where  $1 \leq h \leq H$ ,  $t_0 = 0$ , and  $t_H = \infty$ . The sub-intensity  
 matrix for epoch  $h$  is denoted by  $S_h$ . Then the Green's matrix is:

$$\mathbf{U} = \sum_{h=1}^H \left[ \prod_{i=1}^{h-1} e^{S_i d_i} \right] \mathbf{U}_h \quad (18)$$

where  $d_h = t_h - t_{h-1}$ ,  $\mathbf{U}_h = e^{S_h d_h} S_h^{-1} - S_h^{-1}$ , and  $e^{S_h d_h} = 0$  if  
 $d_h = \infty$ .

48 Applying this theorem requires the evaluation of matrix ex-  
 49 ponentials. Although this can be done analytically for certain  
 50 models (e.g., Waltoft and Hobolth 2018), it is not feasible in the  
 51 models considered here. We instead employ recent numerical  
 52 methods (Al-Mohy and Higham 2010; Moler and Van Loan 2003),  
 53 as implemented in the `expm` function in Matlab. The computa-  
 54 tional cost for obtaining  $e^{S_h d_h}$  is typically  $O(d^3)$ , where  $d$  is the  
 55 dimension of  $S_h$ . Once  $\mathbf{U}$  has been calculated using Theorem 1,  
 56 we can obtain the expected total branch length by  $L_{n_1, n_2} = \mathbf{aUD}$   
 57 (see (13)).

58 In Figures 5a and b, we show  $L$ , the expected total branch  
 59 length for a random sample of  $n = 20$  alleles (see (14)), under  
 60 either a one-step population size increase or a one-step popu-  
 61 lation size reduction. The population size change occurred at  
 62 time  $t$  before the present. Because  $L$  is insensitive to  $\hat{p}_1$  when  
 63  $n$  is relatively large (Figure 4), we only consider  $\hat{p}_1 = 0.5$  (the  
 64 results are qualitatively very similar with  $n = 2$ ; not shown).  
 65 Neutral diversity levels in genomic regions closely linked to the  
 66 selected site are affected by recent population size changes to a  
 67 much smaller extent than regions farther afield. This is because,  
 68 when  $\rho$  is small, the coalescent process is dominated by the slow  
 69 movement via recombination between the two allelic classes,  
 70 which dampens the diversity-changing effects of population size  
 71 changes. In particular, when there has been a recent reduction  
 72 in population size, this effect protects against the loss of neutral  
 73 polymorphisms in a larger genomic region (Figure 5b). Con-  
 74 sequently, strong balancing selection affects a bigger stretch of  
 75 the genome and produces a higher peak of diversity in smaller  
 76 populations, making them easier to detect.

77 It is also instructive to consider the effects of recent popula-  
 78 tion size changes on LD between the selected and neutral loci.  
 79 This can be achieved by replacing  $T$  and  $T_A$  in (9) with  $T(t)$   
 80 and  $T_A(t)$ . In Figures 5c and d, we can see that  $\sigma^2$  converges to  
 81 its new equilibrium level at a much higher rate than the level  
 82 of diversity, which is a well-known effect (e.g., McVean 2002).  
 83 Interestingly,  $\sigma^2$  appears to approach its new equilibrium in a  
 84 non-monotonic way. For instance, in Figure 5c, LD levels at  
 85  $t = 0.4$  are temporarily higher than the equilibrium value (the  
 86 solid black curve), but become lower than the equilibrium value  
 87 at  $t = 1.3$ . In Figure 5d, we can see that the level of LD is higher,  
 88 and extends further, after the population size reduction. These  
 89 effects are due to the corresponding reduction in the scaled re-  
 90 combination rate, and explain why balancing selection becomes  
 91 easier to detect.

## 94 A model of recent balanced polymorphism

95 We now turn our attention to the effects of the recent origin  
 96 of a balanced polymorphism on patterns of genetic variability.  
 97 Consider a diploid panmictic population with constant effective  
 98 population size  $N_e$ . At an autosomal locus, a mutation from  $A_1$   
 99 (the wild type) to  $A_2$  (the mutant) arises. The fitnesses of the  
 100 genotypes  $A_1A_1$ ,  $A_1A_2$ , and  $A_2A_2$  are  $w_{11} = 1 - s_1$ ,  $w_{12} = 1$ ,  
 101 and  $w_{22} = 1 - s_2$  ( $s_1 > 0$  and  $s_2 > 0$ ; i.e., there is heterozygote

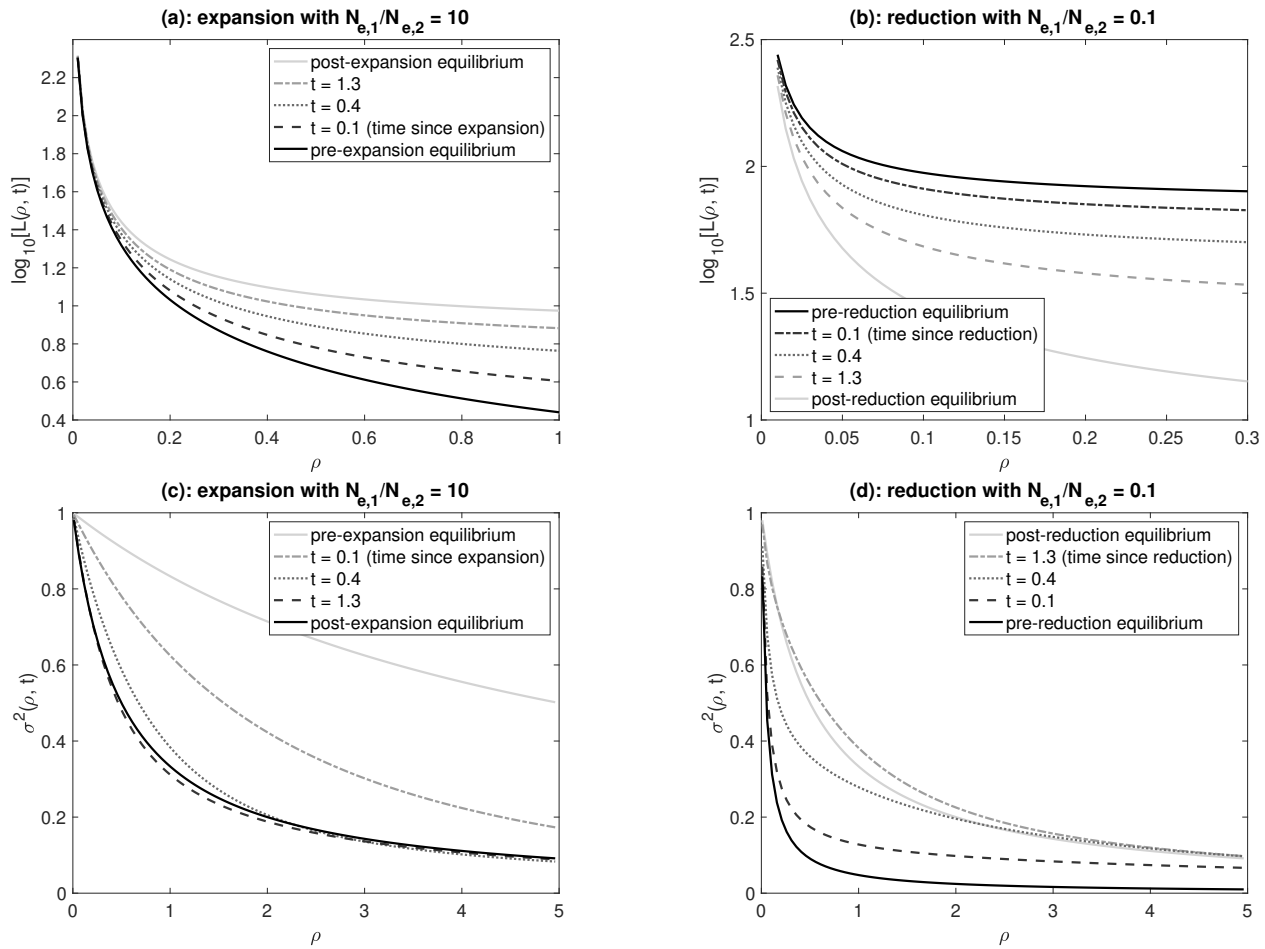

**Figure 5** Expected total branch length and LD as a function of  $\rho$  and  $t$ . The population experienced a one-step change in population size at time  $t$  before the present. The population size in the present and ancestral epochs are  $N_{e,1}$  and  $N_{e,2}$ , respectively. Time is scaled in units of  $2N_{e,1}$  generations. The selected alleles  $A_1$  and  $A_2$  are at equilibrium frequencies  $\hat{p}_1 = \hat{p}_2 = 0.5$ . The sample size is  $n = 20$ .

1 advantage). As above, we ignore reversible mutation between  
2  $A_1$  and  $A_2$ . In what follows, we first use a forward-in-time ap-  
3 proach to obtain equations for describing the increase in the  
4 frequency of  $A_2$  in the population. We then use the backward-  
5 in-time coalescent approach to calculate various measures of  
6 sequence variability in linked genomic regions. Wherever ap-  
7 propriate, we present results from a related selective sweep  
8 model, so that the two models can be compared.

### 9 **Frequency of the mutant allele in the population**

Let the frequencies of  $A_1$  and  $A_2$  in the current generation be  $p_1$   
and  $p_2$ , respectively. Let  $p'_2$  be the frequency of  $A_2$  in the next  
generation. Using the standard theory (reviewed in Chap. 2  
of Charlesworth and Charlesworth (2010)), the change in allele  
frequency in one generation due to selection is given by

$$\Delta p_2 = p'_2 - p_2 = \frac{p_1 p_2 (w_2 - \bar{w})}{\bar{w}} \quad (19)$$

10 where  $w_1 = p_1 w_{11} + p_2 w_{12}$ ,  $w_2 = p_1 w_{12} + p_2 w_{22}$ , and  $\bar{w} =$   
11  $p_1 w_1 + p_2 w_2$ . Assuming that both  $s_1 \ll 1$  and  $s_2 \ll 1$ ,  $\Delta p_2 \approx$   
12  $p_1 p_2 (w_2 - \bar{w}) = p_1 p_2 (p_1 s_1 - p_2 s_2)$ . At equilibrium,  $\Delta p_2 = 0$ ,  
13 such that the frequencies are  $\hat{p}_1 = \frac{s_2}{s_1 + s_2}$  and  $\hat{p}_2 = \frac{s_1}{s_1 + s_2}$ .

14 When  $p_2 \ll 1$ ,  $\Delta p_2 \approx s_1 p_2$ . This is the same as when  $A_2$  is  
15 under positive selection with fitnesses of the three genotypes be-  
16 ing  $w_{11} = 1$ ,  $w_{12} = 1 + s_1$ , and  $w_{22} = 1 + 2s_1$ , respectively (i.e.,

there is semi-dominance). Thus, we expect that the initial signals  
17 generated by the increase in  $p_2$  to be similar to those from an in-  
18 complete selective sweep, referred to here as the "corresponding  
19 sweep model".  
20

The similarity between the two selection models means that  
we can borrow useful results from the selective sweep litera-  
ture. In particular, after  $A_2$  has been generated by mutation, its  
frequency must increase rapidly for it to escape stochastic loss  
when rare. Following an approach first proposed by Maynard  
Smith (1976), we assume that  $p_2$  increases instantly to  $\epsilon = \frac{1}{\gamma_1}$ ,  
where  $\gamma_1 = 2N_e s_1$  (see also Desai and Fisher 2007). Thereafter,  
 $p_2$  changes deterministically until its rate of change becomes  
very slow near the equilibrium point, when the coalescent pro-  
cess (considered in the next sub-section) is effectively the same  
as at equilibrium. Measuring time in units of  $2N_e$  generation,  
 $p_2(t)$  satisfies:

$$\frac{dp_2}{dt} = p_1 p_2 (p_1 \gamma_1 - p_2 \gamma_2) \quad (20)$$

where  $\gamma_2 = 2N_e s_2$ . The solution to this differential equation is

$$\gamma_1 \ln(1 - p_2) + \gamma_2 \ln p_2 - (\gamma_1 + \gamma_2) \ln[\gamma_1 - (\gamma_1 + \gamma_2) p_2] = \gamma_1 \gamma_2 (t + c) \quad (21)$$



1 where  $c$  is a constant such that  $p_2(0) = \epsilon$ . We can obtain  $p_2(t)$   
 2 by fixing  $t$  on the right-hand side and solving the equation nu-  
 3 merically with respect to  $p_2$ .

It is instructive to compare the dynamics of  $p_2(t)$  with those  
 for the corresponding sweep model defined above. We assume  
 that the frequency of the positively selected variant  $A_2$  increases  
 instantly to  $\epsilon$  and grows deterministically until  $1 - \epsilon$ . Let  $p_2^*(t)$   
 be the frequency of  $A_2$  at scaled time  $t$  after its frequency has  
 arrived at  $\epsilon$ . It can be shown that:

$$p_2^*(t) = \frac{\epsilon}{\epsilon + (1 - \epsilon)e^{-\gamma t}} \quad (22)$$

4 (Crow *et al.* 1970; Stephan *et al.* 1992).

5 A recent study explicitly considered the stochastic phases  
 6 when the frequency of the positively selected variant  $A_2$  is below  
 7  $\epsilon$  or greater than  $1 - \epsilon$  (Charlesworth 2020). These two phases  
 8 contribute relatively little to the fixation time under the current  
 9 model with strong selection and semi-dominance (see Table 1 of  
 10 Charlesworth 2020). Furthermore, when the frequency of  $A_2$  is  
 11 very close to 0 or 1, the coalescent process is effectively the same  
 12 as under neutrality. Thus, ignoring these two stochastic phases  
 13 is reasonable for our purposes.

14 In Figure 6, we display three balancing selection models, all  
 15 with  $\gamma_1 = 500$ , but different  $\gamma_2$  values, so that they have different  
 16 equilibrium allele frequencies. For comparison, the correspond-  
 17 ing sweep model with  $\gamma_1 = 500$  is also presented. As can be  
 18 seen, the allele frequency trajectories for the balancing selection  
 19 models and the corresponding sweep model are similar only  
 20 for a rather short period. After that,  $p_2(t)$  increases at a much  
 21 slower pace than  $p_2^*(t)$ . As shown below, these observations  
 22 explain the differences between recent balanced polymorphism  
 23 and the spread of a beneficial mutation with respect to their  
 24 effects on diversity patterns in nearby genomic regions.

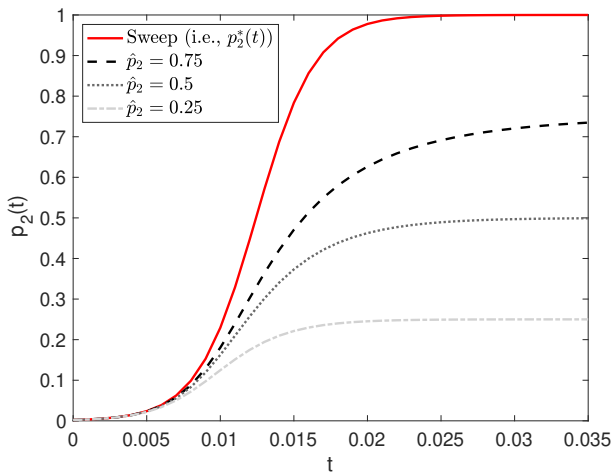

**Figure 6** The frequency of the mutant allele  $A_2$  as a function of  $t$  (time since its frequency reaches  $\epsilon$ ).  $\gamma_1 = 500$ .  $\gamma_2$  is adjusted such that the equilibrium frequency  $\hat{p}_2$  is 0.25, 0.5, and 0.75, respectively. The trajectory under the corresponding sweep model is included for comparison.

### 25 Total branch length

26 We extend the coalescent approach developed above for the equi-  
 27 librium model, in order to calculate the expected total branch  
 28 length  $L$  for a random sample of size  $n$  at a linked neutral

site (see (14)). The frequency of  $A_2$  at the time of sampling  
 is  $p_2(t)$  where  $t$  is the time since the frequency of  $A_2$  reaches  
 $\epsilon$ , expressed in units of  $2N_e$  generations. At time  $\tau$  before the  
 present ( $0 \leq \tau < t$ ), the frequency of  $A_2$  is given by  $p_2(t - \tau)$ .  
 For  $\tau \geq t$ , the process reduces to a standard neutral coales-  
 cent model with constant population size. To make use of  
 Theorem 1, we divide  $[p_2(t), \epsilon]$  into  $H - 1$  equal-sized bins,  
 such that the  $h$ -th bin is  $[p_{2,h-1}, p_{2,h}]$ , where  $p_{2,0} = p_2(t)$  and  
 $p_{2,h} = p_2(t) + \frac{h}{H-1}(\epsilon - p_2(t))$  ( $h \in \{1, 2, \dots, H-1\}$ ). Let  $\tau_h$   
 be the solution to  $p_2(t - \tau_h) = p_{2,h}$  given by (21). The correspond-  
 ing time interval for bin  $h$  is  $[\tau_{h-1}, \tau_h]$ , which is shorter when  
 the frequency of  $A_2$  is changing at a faster rate. Thus, as shown  
 in Figure 7, we have  $H$  epochs, with the first  $H - 1$  in  $[0, t)$  and  
 epoch  $H$  covering the whole of  $[t, \infty)$ .

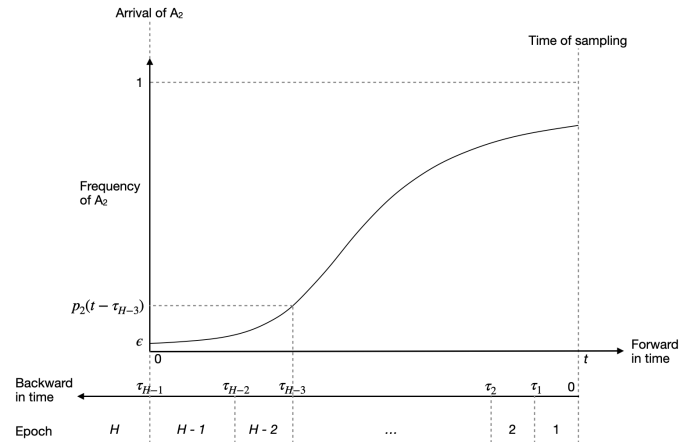

**Figure 7** A diagram showing the discretisation scheme used to obtain the expected total branch length and the site frequency spectrum under the model of recent balanced polymorphism.

Consider epoch  $h$  with  $h < H$ . The state space in this epoch is  
 the same as that discussed above for the equilibrium model (see  
 the arguments leading to (10)). Thus, the sub-intensity matrix  
 for this epoch,  $S_h$ , can be obtained in a similar way (cf., Figure  
 S4). The only complication is that the frequency of  $A_2$  changes  
 within the epoch. However, if the time interval is sufficiently  
 small, we can treat the frequency of  $A_2$  as if it were constant.  
 Here we fix the frequency of  $A_2$  in epoch  $h$  to its harmonic mean  
 $q_{2,h}$ , which can be calculated as:

$$\frac{1}{q_{2,h}} = \frac{1}{\tau_h - \tau_{h-1}} \int_{\tau_{h-1}}^{\tau_h} \frac{1}{p_2(t - \tau)} d\tau. \quad (23)$$

We can then obtain  $S_h$  by simply replacing  $\hat{p}_1$  and  $\hat{p}_2$  in the sub-  
 intensity matrix for the equilibrium model with  $q_{1,h}$  and  $q_{2,h}$ ,  
 where  $q_{1,h} = 1 - q_{2,h}$ .

Note that, although the space state is the same for the epochs  
 in  $[0, t)$ , this is not true for the transition from epoch  $H - 1$  to  
 epoch  $H$ . At the end of epoch  $H - 1$ , if more than one allele is  
 associated with  $A_2$ , they coalesce into a single ancestral allele  
 instantly. If the resulting ancestral allele is the only allele left,  
 the process is terminated. Otherwise, if there are also  $n_1$  alleles  
 associated with  $A_1$  at the time, then the  $n_1 + 1$  alleles enter epoch  
 $H$  and coalesce at rate  $\binom{n_1+1}{2}$ . Thus, we need a mapping matrix  
 $E_{H-1,H}$ , which is defined below (S22) in Supplementary Text  
 S.3, to correct for the differences between the two epochs. For  
 instance, for a sample of two alleles, the state space in  $[0, t)$  has  
 three transient states: (0, 2), (1, 1), and (2, 0), where the first and

1 second number of each tuple represent the number of alleles  
 2 linked to  $A_1$  and  $A_2$ , respectively. However, epoch  $H$  has only  
 3 one transient state, representing two uncoalesced alleles. If the  
 4 process is in state  $(0, 2)$  at the end of  $[0, t)$ , it terminates with the  
 5 instant coalescence of the two alleles. If the process is in any of  
 6 the other two states, it enters epoch  $H$  with the same starting  
 7 condition. Thus  $E_{H-1,H}^T = (0, 1, 1)$ , where 0 in the first element  
 8 means it is impossible to enter epoch  $H$  via state 1 in epoch  
 9  $H - 1$ , and the 1s mean that, if the process is in state 2 or 3 by  
 10 the end of epoch  $H - 1$ , the process begins epoch  $H$  in state 1.

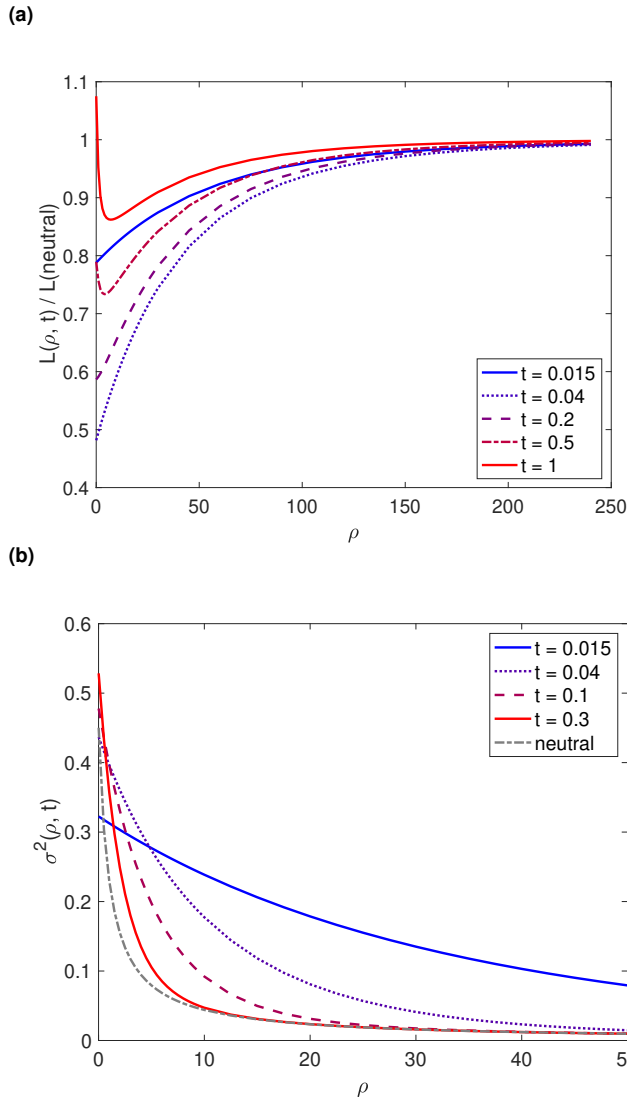

**Figure 8** Nucleotide site diversity and LD in genomic regions surrounding a recently-emerged variant under balancing selection. The parameters are  $\gamma_1 = 500$  and  $\hat{p}_2 = 0.75$  (as in Figure 6). The discretisation scheme has  $H = 76$  bins. In (a), the expected total branch length for a sample of  $n = 2$  alleles is calculated for various value of  $t$ , the time since the frequency of  $A_2$  reaches  $\epsilon$ . To make the effects more visible,  $L$  is divided by its neutral expectation.  $\sigma^2$  in (b) measures the level of LD between the selected locus and a linked neutral site. For comparison, the neutral expectation of  $\sigma^2$  is also included.

11 In all, the model has the following parameters:  $\gamma_1$ ,  $\gamma_2$ ,  $t$ , and  
 12  $\rho$ . By increasing the number of bins in the discretisation scheme

(i.e.,  $H$ ; Figure 7), we can get arbitrarily accurate approximations. The results presented below are based on values of  $H$  such that the size of the frequency bins is about 1%. This is a rather conservative choice; using larger bins does not significantly change the results. Once the sub-intensity matrices are defined (i.e.,  $S_h$  for  $1 \leq h \leq H$ ), we can obtain  $\mathbf{U}$  using Theorem 1 (see also Supplementary Text S.3) and  $L = \alpha \mathbf{U} \mathbf{D}$  (see (13)).

Figure 8a shows how neutral diversity levels are affected by a recent balanced polymorphism, using the balancing selection model with  $\hat{p}_2 = 0.75$  considered in Figure 6. Initially, the rapid increase in the frequency of  $A_2$  produces a drop in neutral diversity in nearby regions (the solid blue line). The maximum extent of reduction appears when  $p_2(t)$  is close to its equilibrium value (the dotted line;  $p_2(0.04) = 0.742$ ). After that, the diversity level starts to recover. Here, the increase in diversity level is fastest for regions closely linked to the selected site, because coalescence is slow when  $\rho$  is small. This leads to a U-shaped diversity pattern that persists for some time, which is followed by a rather slow approach to the equilibrium value (Figure S5). These dynamics are qualitatively the same when we consider a larger sample size with 20 alleles, although the reduction in diversity is less pronounced (Figure S6). Similar patterns are also observed for the other two balancing selection models in Figure 6 (Figure S7). The main difference is that models with a smaller  $\hat{p}_2$  tend to result in a smaller reduction in neutral diversity. For instance, for the model with  $\hat{p}_2 = 0.25$ , the maximum reduction in nucleotide site diversity in very tightly linked regions is less than 6% (as opposed to a more than 50% reduction in Figure 8a), making them very difficult to detect from data.

#### LD between the selected locus and a linked neutral site

It is straightforward to use the method developed in the previous subsection to calculate  $\sigma^2$ . From Figure 8b, we make two observations. First, LD builds up quickly and extends to a large genomic region when the frequency of  $A_2$  is increasing rapidly (blue solid curve vs the neutral curve). This suggests the formation of long haplotypes around the selected locus, which can be used to help detect selection targets, as is done in extended haplotype tests (e.g., Voight *et al.* 2006; Ferrer-Admetlla *et al.* 2014). Second, the level of LD starts to decline before the reduction in diversity is maximal (the dotted curves in Figures 8a and b), suggesting that LD based detection methods will have already lost a substantial amount of their statistical power by this time. This implies that LD and diversity patterns complement each other when it comes to detecting targets of recent balancing selection.

#### Differences between balancing selection and selective sweeps in their effects on $L$ and LD

We can analyse selective sweep models using the discretisation scheme outlined in Figure 7. In Figure 9a, we compare the balancing selection model shown in Figure 8 to its corresponding sweep model, with respect to their effects on  $L$ . Because the frequency of the beneficial allele increases much more rapidly (Figure 6), it causes a more pronounced reduction in diversity than the balanced polymorphism of the same age (before fixation of the beneficial variant). After fixation of the beneficial allele, diversity returns to its neutral level over a time period of the order of  $2N_e$  generations, which is much faster than the time it takes for diversity to reach its equilibrium level under balancing selection (Figure S5). The patterns are similar when a larger sample size is considered (Figure S8).

A comparison between the two selection models with respect

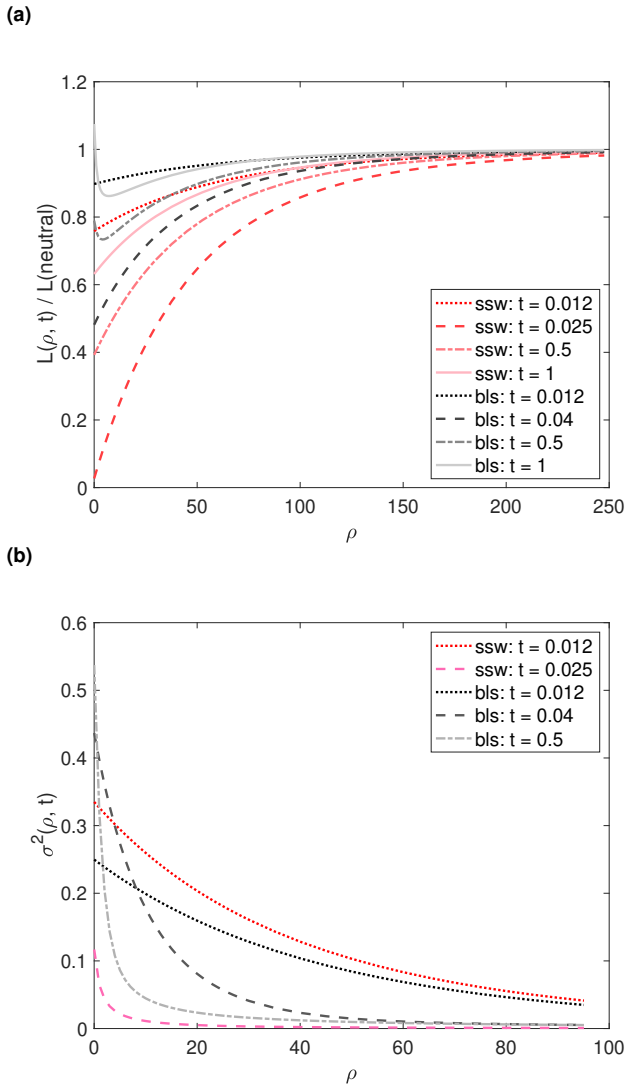

**Figure 9** Comparing recent balancing selection with the corresponding sweep model, with respect to their effects on diversity and LD levels in surrounding genomic regions. The parameters of the balancing selection model (bls) are  $\gamma_1 = 500$  and  $\hat{p}_2 = 0.75$  (i.e., the same as in Figure 8). The corresponding sweep model (ssw) has  $\gamma_1 = 500$ . In (a), the expected total branch length for a sample of  $n = 2$  alleles, divided by its neutral value, is presented. In (b), we consider the level of LD between the selected locus and a linked neutral site, as measured by  $\sigma^2$ . Fixation (taken as the time when the mutant allele frequency reaches  $1 - \epsilon$ ) occurs at  $t = 0.025$  under the sweep model. The reduction in diversity reaches its maximum at  $t \approx 0.04$  under the balancing selection model.

tion. Therefore, a sizeable genomic region remains at elevated levels of LD with the selected locus for a longer period. Recall that diversity levels also take much longer to reach equilibrium under balancing selection (Figure 9a). Thus, there may well be a bigger window of opportunity for detecting targets of recent balancing selection, despite the fact that the signals they produce tend to be less dramatic than those produced by the corresponding sweep model.

### The site frequency spectrum

The SFS can also be obtained using the time discretisation procedure. Here the state space is the same as that detailed for the equilibrium balancing selection model. As above, we obtain the sub-intensity matrix for epoch  $h$  by replacing  $\hat{p}_1$  and  $\hat{p}_2$  in the sub-intensity matrix for the equilibrium model (e.g., Supplementary Text S.2) with  $q_{1,h}$  and  $q_{2,h}$ , respectively. We then use Theorem 1 to calculate  $X_i^{(n_1, n_2)}$ . It is more instructive to consider the SFS for a sample of  $n$  randomly collected alleles, defined as:

$$X_i = \sum_{j=0}^n \binom{n}{j} p_1^j p_2^{n-j} X_i^{(j, n-j)} \quad (24)$$

where  $p_1$  and  $p_2$  are the frequencies of  $A_1$  and  $A_2$  at the time of sampling. The effects of selection has on the shape of the SFS are visualised using the ratio  $X_i / X_i(\text{neutral})$ , where  $X_i(\text{neutral}) = 2\theta / i$ .

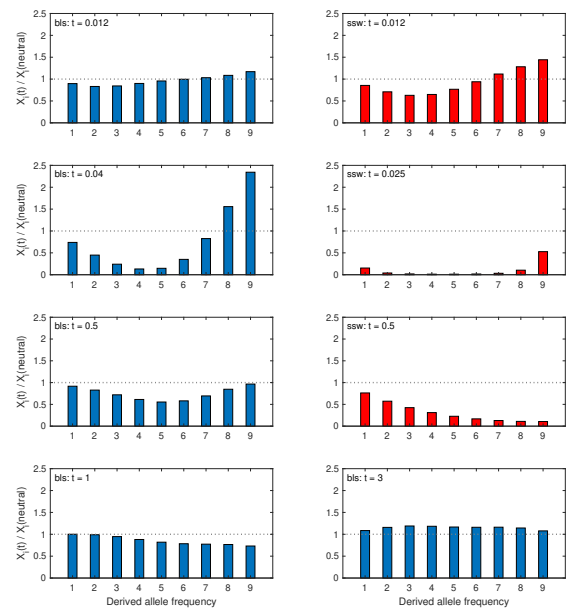

**Figure 10** The SFS at various time points after the arrival of the selected variant for a random sample of 10 alleles. The balancing selection (bls) and selective sweep (ssw) models are the same as those shown in Figure 9. The scaled distance between the focal neutral site and the selected site is  $\rho = 2$ . The reduction in diversity reaches its maximum at  $t \approx 0.04$  and  $0.025$  (fixation) under the balancing selection and selective sweep models, respectively. The SFS under selection is expressed relative to its neutral expectation.

1 to their effects on LD patterns in the surrounding neutral region is shown in Figure 9b. Both models result in elevated LD.  
 2 As expected, the corresponding sweep model leads to a more pronounced build-up of LD (red vs black dotted lines). This  
 3 suggests that recent balancing selection is harder to detect than a comparable beneficial mutation. Under both models, LD starts  
 4 to decay before the reduction in diversity is maximal (pink vs grey dashed lines). The decay appears to be much faster under  
 5 the sweep model. This is because, under the balancing selection model,  $A_2$  approaches an equilibrium frequency, instead of fixa-

1 In Figure 10, we present the SFS at different time points since  
 2 the arrival of the mutant allele, for the balancing selection model  
 3 and the corresponding sweep model considered in Figures 8  
 4 and 9. When the frequency of the selected variant is rapidly  
 5 increasing in the population, both types of selection produce a  
 6 U-shaped SFS, with an excess of both low and high frequency  
 7 derived variants. The extent of distortion is maximised around  
 8 the time when the reduction in neutral diversity is also the most  
 9 pronounced (see plots in the second row). The corresponding  
 10 sweep model has a much bigger effect on the shape of the SFS.  
 11 For example, under the sweep model, at the time of fixation  
 12 ( $t = 0.025$ ),  $X_9/X_8 = 4.91$  and  $X_1/X_2 = 8.05$ . In contrast, when  
 13 the SFS is most distorted under the balancing selection model  
 14 ( $t = 0.04$ ),  $X_9/X_8 = 1.34$  and  $X_1/X_2 = 3.29$ . The excess of  
 15 high frequency derived variants quickly disappears after the  
 16 selected allele has stopped its rapid increase in frequency (plots  
 17 in the third row), although the SFS remains U-shaped for longer  
 18 under balancing selection. The plots in the last row shows the  
 19 transition from a situation with reduced diversity and an excess  
 20 of low frequency variants to a situation that resembles the  
 21 pattern expected under long-term balancing selection, with an  
 22 elevated diversity level and an excess of intermediate frequency  
 23 variants. Qualitatively similar dynamics have been observed  
 24 for the balancing selection models with  $\hat{p}_2 = 0.5$  and 0.25,  
 25 respectively, considered in Figure 6. Again, the SFS-distorting  
 26 effect is weaker when  $\hat{p}_2$  is smaller (Figure S9), with the case  
 27 with  $\hat{p}_2 = 0.25$  producing hardly any excess of low and high  
 28 frequency variants due to the increase in the frequency of  $A_2$ .

To investigate the SFS further, we consider  $\pi$  (the nucleotide  
 site diversity) and Watterson's  $\theta_W$ . Recall that, under the infinite  
 sites model,  $\pi = 2\theta T$ , where  $T$  is defined by (7). Let  $S$  be the  
 expected number of segregating sites in a sample of size  $n$ . We  
 have  $S = \theta L$ . Because  $\theta_W = S/a_n$  where  $a_n = \sum_{i=1}^{n-1} \frac{1}{i}$ , we have  
 $\theta_W = \theta L/a_n$ . Following [Becher et al. \(2020\)](#), we define

$$\Delta\theta_W = 1 - \frac{\pi}{\theta_W} = 1 - \frac{2\theta T}{\theta L/a_n} = 1 - \frac{2a_n T}{L}. \quad (25)$$

29  $\Delta\theta_W = 0$  under neutrality,  $> 0$  when there is an excess of rare  
 30 variants, and  $< 0$  when there is an excess of intermediate fre-  
 31 quency variants.

32 Figure 11 shows  $\Delta\theta_W$  for the balancing selection model with  
 33  $\gamma_1 = 500$  and  $\hat{p}_2 = 0.75$  (as in Figures 6 - 10); the correspond-  
 34 ing sweep model is also included for comparison. At  $t = 0.012$ , the  
 35 balancing selection model produces no obvious deviation from  
 36 neutrality (black dotted line), whereas the sweep model has  
 37 already started to cause a significant excess of rare variants (red  
 38 dotted line). This is consistent with the much slower increase  
 39 in the frequency of  $A_2$  under balancing selection ( $p_2(t) = 0.3$   
 40 vs  $p_2^*(t) = 0.5$ ). The extent of deviation caused by the sweep  
 41 is maximal around the time when  $A_2$  becomes fixed ( $t \approx 0.025$ ;  
 42 pink dashed line). Under the balancing selection model, the  
 43 maximum deviation is when the frequency of  $A_2$  becomes close  
 44 to its equilibrium value ( $t \approx 0.04$ ; grey dashed line), but is less  
 45 pronounced than under the sweep model. After the maximum  
 46 is achieved, diversity patterns gradually return to neutrality  
 47 over  $4N_e$  generations under the sweep model. For the balancing  
 48 selection model, there is a much longer period of non-stationary  
 49 dynamics as shown by the light blue and blue lines.

50 It is instructive to compare the three balancing selection mod-  
 51 els with  $\gamma_1 = 500$ , but with different equilibrium allele frequen-  
 52 cies (Figure 6). The model with  $\hat{p}_2 = 0.75$  produces the strongest  
 53 sweep-like signals, including a reduction in diversity and excess

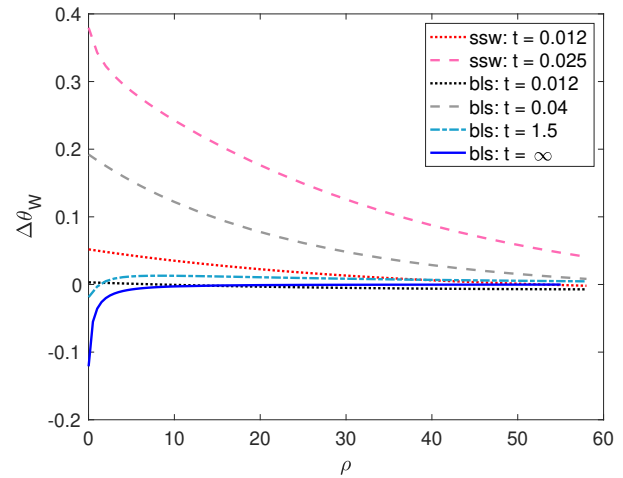

Figure 11  $\Delta\theta_W$  as a function of  $\rho$  and  $t$ . The two selection mod-  
 els are the same as those considered in Figure 10. "bls:  $t = \infty$ "  
 corresponds to the equilibrium under balancing selection. The  
 sample size is 10.

of rare variants (Figure 11 vs Figure S10). At the other extreme,  
 the model with  $\hat{p}_2 = 0.25$  effectively emits no such signal (Fig-  
 ure S10). Thus, targets of recent balancing selection with larger  
 $\hat{p}_2$  are easier to detect. However, for older targets of selection,  
 the excess of intermediate frequency variant (i.e., negative  $\Delta\theta_W$ )  
 is most noticeable for selection targets with  $\hat{p}_2 \approx 0.5$  (Figure  
 S10), making them the most amenable to detection. Altogether,  
 it seems that balancing selection targets with low equilibrium  
 allele frequencies (e.g.,  $\hat{p}_2 \approx 0.25$ ) are difficult to identify regard-  
 less of their age.

## Discussion

In this study, we have used the power and flexibility afforded by  
 phase-type theory to study the effects of balancing selection on  
 patterns of genetic variability and LD in nearby genomic regions.  
 Our results go beyond previous attempts in that they provide  
 a unifying framework for calculating important statistics for  
 both equilibrium and nonequilibrium cases. In what follows, we  
 discuss how our results can be used in data analyses and future  
 method developments. We will also discuss the usefulness of  
 phase-type theory in general.

### Accommodating other biological factors

Here we have only considered selection on an autosomal locus  
 in a randomly mating population. However, our results can be  
 readily extended to accommodate other important biological  
 factors. Take self-fertilization as an example. Let  $s$  be the selfing  
 rate and  $F = s/(2 - s)$  be the corresponding inbreeding coeffi-  
 cient. For this model,  $N_e = N/(1 + F)$ , where  $N$  is the number  
 of breeding individuals ([Charlesworth 2009](#)). Because selfing  
 increases the frequency of homozygotes in the population, it re-  
 duces the effective frequency of recombination to  $r_e = (1 - F)r$ ,  
 where  $r$  is the autosomal recombination rate in a random-mating  
 population ([Nordborg 1997](#); see [Hartfield and Bataillon 2020](#)  
 for a more accurate expression for  $r_e$ ). Finally, for the model of  
 recent balancing selection, we also need to consider the effects of  
 selfing on the frequency trajectory of  $A_2$ . This can be achieved

by replacing (20) with:

$$\frac{dp_2}{dt} = p_1 p_2 [(1 - F)(p_1 \gamma_1 - p_2 \gamma_2) + F(\gamma_1 - \gamma_2)]. \quad (26)$$

1 Other factors, including division into two sexes, mode of inheritance (e.g., X-linkage vs autosomal), and background selection, can also be modelled (Charlesworth 2009; Vicoso and Charlesworth 2009; Glémin 2012; Charlesworth 2020; Hartfield and Bataillon 2020).

### 6 **Detecting long-term balancing selection**

7 We have examined two models of long-term balancing selection, one with a constant population size and the other with recent demographic changes. We confirm the well-known result that long-term balancing selection leads to elevated diversity and LD in a relatively small region in the immediate vicinity of the locus under selection (Charlesworth 2006; Fijarczyk and Babik 2015). We also find that, under our two-allele model, the strength of these signals is highest when the equilibrium frequencies of the selected variants are close to 50%, and weakens when the frequencies become unequal (Figures 2 and 3), so that genome scan methods are biased towards detecting selection targets where the selected variants are more common (Bitarello *et al.* 2018; Siewert and Voigt 2020).

9 Our results can be used to improve existing methods for detecting balancing selection. For example, the  $T_1$  test by DeGiorgio *et al.* (2014), which has been shown to be among the most powerful, is based on  $L$ , the expected total branch length. The recursion equations DeGiorgio *et al.* (2014) used to obtain  $L$  assumes a constant population size. We can now relax this assumption by incorporating changes in population size. The increase in the strength of signals of long-term balancing selection after population size reduction (Figure 5b) points to the importance of incorporating non-equilibrium demographic dynamics, which may help to increase statistical power and reduce false positive rates. On the other hand, the results presented in Figure 4 shows that the number of segregating sites in the sample, denoted by  $S$ , does not capture all of the information about balancing selection in the data. Instead, statistical power can be gained by making use of the SFS. Recall that  $S = \theta L$ . This explains why the  $T_1$  test (based on  $L$ ) is often less powerful than the  $T_2$  test (based on the SFS) (DeGiorgio *et al.* 2014). However, DeGiorgio *et al.* (2014) obtained the SFS via stochastic simulations, due to a lack of analytical methods. Here we have filled this gap. As above, it is of interest to extend the  $T_2$  test, so that it includes both the equilibrium and non-equilibrium models.

### 42 **Detecting recent balancing selection**

43 It has long been suggested that signals generated by recent balancing selection should be similar to those generated by incomplete sweeps (Charlesworth 2006; Fijarczyk and Babik 2015). Empowered by time-inhomogeneous phase-type theory, we present a systematic comparison between these two models. The dynamics of a recent balanced polymorphism are similar to those of a beneficial mutation of comparable strength when the frequency of the mutant allele is no more than a few percent in the population (Figure 6). This period is only a small fraction of the time it takes for the beneficial mutation to become fixed. In addition, the sigmoid shape of the allele frequency trajectories clearly indicates that the rate of allele frequency change in this period is slower than when the mutant allele is more common. Combining these two factors, it is unsurprising that, when the allele frequency trajectories under the two models start to diverge,

neither model produce a noticeable effect on diversity patterns in nearby genomic regions (data not shown). Thus, this initial period of identity contributes very little signal.

After the initial period, the frequency of the beneficial mutation increases rapidly. In contrast, the rate of growth under the balancing selection model is much slower, especially when the equilibrium frequency of the mutant allele is low (Figure 6). Nonetheless, the increase in frequency of a recent balanced polymorphism does produce sweep-like diversity patterns, but they are more subtle than for sweeps. These include reductions in genetic variability, a skew towards high and low frequency derived variants in the SFS, and a build-up of LD between the selected and linked neutral sites (Figures 8 - 11). In addition, similar to sweeps, the maximum build-up of LD appears before the reduction in diversity levels and the distortion of the SFS are most pronounced, suggesting that these signals complement each other. Thus, we expect that these patterns, which exist in a period around the time at which the frequency of the mutant gets close to its equilibrium value, should be detectable by methods designed for identifying sweeps (Booker *et al.* 2017; Pavlidis and Alachiotis 2017), as has been shown previously (Zeng *et al.* 2006). An open question is whether it is possible to distinguish between these two types of selection. Another question is related to the result that recent balancing selection causes diversity and LD patterns to be in a non-equilibrium state for a long period. It is unclear whether these patterns can be exploited for detecting selection targets.

It is informative to compare the three balancing selection models with equilibrium allele frequencies  $\hat{p}_2 = 0.25, 0.5$ , and  $0.75$ , respectively (Figure 6). The model with  $\hat{p}_2 = 0.75$  produces the strongest sweep-like patterns (e.g., Figure 10 vs Figure S9). These recent selection targets should be easiest to detect, although they may also be the most difficult to be separated from sweeps. On the other hand, although selection targets with  $\hat{p}_2 = 0.5$  are not as easy to detect when they are young, they produce the strongest deviation from neutrality if they have been maintained for a sufficiently long period of time (Figures 2, 3, and S10), suggesting that they are most likely to be picked up by methods for detecting long-term selection targets. Finally, it seems that selection targets with  $\hat{p}_2 = 0.25$  are the most difficult to detect regardless of the age of the mutant allele.

### 99 **Using phase-type theory to assess the accuracy of simpler approximations**

We have shown the ease for which phase-type theory can be used to analyse complex models. In some cases, this can lead to simple analytic solutions (e.g., (5) and (6)). When explicit analytic solutions are difficult to obtain, phase-type theory can serve as a useful tool to search for simpler approximations. Take the model of recent balancing selection as an example. By using a large number of bins in the discretisation scheme (Figure 7), we can obtain results that are effectively exact. It is, however, impossible to write them as simple equations. Nonetheless, if we make an additional assumption that the recombination frequency between the selected locus and the neutral locus is not too high relative to the strength of selection, we can adopt the methods developed in Charlesworth (*under review*) for selective sweeps, such that they can be used to obtain the expected pairwise coalescence time (see Supplementary Text S.5 for details).

We can assess the reliability of this approximation by comparing its results with those obtained using the phase-type method. As expected, the approximate results match the exact results

1 closely when the recombination rate is low (e.g.,  $\rho = 1$  in Figure  
 2 12). For higher recombination rates, the approximation under-  
 3 estimates the diversity-reducing effect of the spread of  $A_2$ . The  
 4 main reason for this discrepancy is because the approximation  
 5 assumes that the recombination rate is low, and the “sweep  
 6 phase” is short. When these assumptions hold, once recombina-  
 7 tion during the sweep phase has moved a lineage from allelic  
 8 class 2 to allelic class 1, back migration to allelic class 2 can be  
 9 ignored. Although these assumptions work well for selective  
 10 sweep models Charlesworth (*under review*), they are less suitable  
 11 for the model of recent balancing selection, because the increase  
 12 in allele frequency is much slower, leading to a longer sweep  
 13 phase, and hence more opportunities for recombination. Thus,  
 14 by preventing lineages from being moved back into allelic class  
 15 2, the approximation artificially slows down the rate of coales-  
 16 cence during the sweep phase, explaining the overestimation  
 17 of pairwise coalescence time. Using results produced by phase-  
 18 type theory as the baseline is desirable because, unlike stochastic  
 19 simulations, these results are analytical, making comparisons  
 20 straightforward and small differences easier to detect.

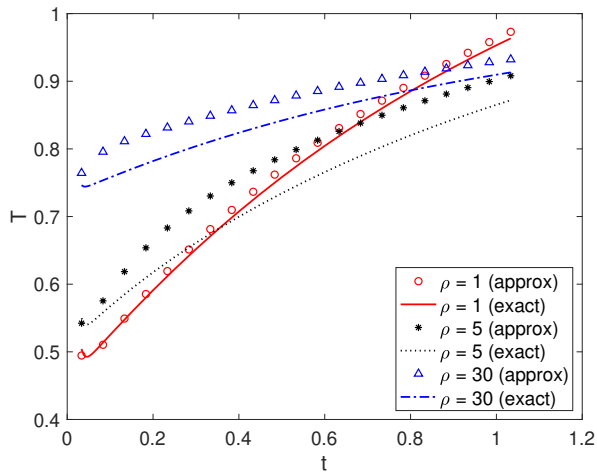

**Figure 12** Comparing expected pairwise coalescence times obtained by phase-type theory (exact) and an approximation assuming low recombination rates. The model of recent balancing selection has the following parameters:  $\gamma_1 = 500$  and  $\hat{\rho}_2 = 0.75$  (i.e., the same as in Figures 8 - 11).  $t$  is the time since the arrival of  $A_2$ . The discretisation scheme has  $H = 76$  epochs. Details of the approximation are given in Supplementary Text S.5.

## 21 **Applying phase-type theory to other population genetic mod-** 22 **els**

23 Phase-type theory is highly flexible and can be applied to many  
 24 different models in population genetics. For example, Hobolth  
 25 *et al.* (2019) used a time-homogeneous version of the model  
 26 to study the standard Kingman’s coalescent with and without  
 27 recombination, coalescent models with multiple mergers, and  
 28 coalescent models with seed banks. They show the ease for  
 29 which useful results can be obtained (e.g., all the moments of  
 30 the pairwise coalescence time, the covariance in coalescence  
 31 times between two linked loci, or the SFS). By extending the  
 32 framework to non-equilibrium cases, we make this approach  
 33 applicable to a yet larger class of models. In addition to Theo-  
 34 rem 1 (see also Corollary 1), we have also proved Theorem 2 in

Supplementary Text S.4, which can be used to obtain the second  
 moment of the mean coalescence time. We can now, for instance,  
 introduce population size fluctuations into the models consid-  
 ered by Hobolth *et al.* (2019). Even for models that have been  
 analysed before using other approaches (e.g., Matuszewski *et al.*  
 2017), it is worth exploring whether the new theory provides a  
 better alternative, both in terms of ease of analysis and numeri-  
 cal stability of the resulting method, which may be beneficial for  
 parameter estimation purposes (e.g., Kern and Hey 2017).

The phase-type approach may be particularly useful for mod-  
 els that involve selection on a single locus at which the fre-  
 quencies of the selected variants are “tightly regulated” in the  
 sense that the dynamics of the allele frequencies over time are  
 deterministic (Maynard Smith and Haigh 1974; Kaplan *et al.*  
 1988; Coop and Ralph 2012). These include the balancing selec-  
 tion models considered here, selective sweep models (Barton  
 1998; Kim and Stephan 2002; Kim and Nielsen 2004; Ewing  
*et al.* 2010; Charlesworth 2020; Hartfield and Bataillon 2020), soft  
 sweeps caused by recurrent mutation or migration (Pennings  
 and Hermisson 2006), incomplete sweeps (Vy and Kim 2015),  
 and recurrent sweeps (Kaplan *et al.* 1989; Kim 2006; Campos and  
 Charlesworth 2019).

Here, we have briefly considered selective sweep models with  
 semi-dominance and compared it to the corresponding balancing  
 selection model (see (22) and Figures 6, 9 - 11). In a related  
 study, we will use the phase-type approach to look at some of  
 the sweep models listed above more systematically (K. Zeng and  
 B. Charlesworth, *in prep*). As discussed above, because we can  
 use phase-type theory to obtain exact solutions, it provides a  
 convenient way to determine the accuracy of existing approxima-  
 tions. For instance, for the sweep model with semi-dominance,  
 a widely-used approximation assumes that there is no coalescence  
 during the sweep phase, such that the gene tree for a set of alleles  
 sampled immediately after a sweep has a simple “star shape”  
 (Maynard Smith and Haigh 1974; Barton 2000; Durrett and  
 Schweinsberg 2004). However, a recent study of the pairwise  
 coalescence time suggests that this approximation can be rather  
 inaccurate when the ratio of the recombination rate to the selection  
 coefficient is high Charlesworth (*under review*). It is important  
 to also assess the effect of this simplifying assumption on the  
 SFS, given that both nucleotide site diversity and the SFS are  
 informative when it comes to estimating the strength and preva-  
 lence of (recurrent) sweeps (Corbett-Detig *et al.* 2015; Elyashiv  
*et al.* 2016; Booker *et al.* 2017; Comeron 2017). In addition,  
 we can also explore the joint effects of recurrent sweeps and  
 recent population size changes. These are not well understood,  
 and are important for estimating the relative importance of  
 background selection and recurrent sweeps in shaping genome-  
 wide patterns of variability (e.g., Johri *et al.* 2020).

## 25 **Literature Cited**

- 26 Al-Mohy, A. H. and N. J. Higham, 2010 A new scaling and  
 27 squaring algorithm for the matrix exponential. *SIAM Journal*  
 28 *on Matrix Analysis and Applications* **31**: 970–989.  
 29 Andersen, L. N., T. Mailund, and A. Hobolth, 2014 Efficient  
 30 computation in the im model. *J Math Biol* **68**: 1423–51.  
 31 Andres, A. M., M. J. Hubisz, A. Indap, D. G. Torgerson, J. D.  
 32 Degenhardt, *et al.*, 2009 Targets of balancing selection in the  
 33 human genome. *Molecular Biology and Evolution* **26**: 2755–  
 34 2764.

- 1 Bakker, E. G., C. Toomajian, M. Kreitman, and J. Bergelson, 2006  
2 A genome-wide survey of r gene polymorphisms in arabidopsis. *The Plant Cell* **18**: 1803–1818.  
3  
4 Barton, N. H., 1998 The effect of hitch-hiking on neutral genealogies. *Genetics Research* **72**: 123–133.  
5  
6 Barton, N. H., 2000 Genetic hitchhiking. *Philosophical Transactions of the Royal Society of London. Series B: Biological Sciences* **355**: 1553–1562.  
7  
8 Becher, H., B. C. Jackson, and B. Charlesworth, 2020 Patterns of genetic variability in genomic regions with low rates of recombination. *Current Biology* **30**: 94–100 e3.  
9  
10 Bitarello, B. D., C. de Filippo, J. C. Teixeira, J. M. Schmidt, P. Kleinert, *et al.*, 2018 Signatures of long-term balancing selection in human genomes. *Genome Biology and Evolution* **10**: 939–955.  
11  
12 Booker, T. R., B. C. Jackson, and P. D. Keightley, 2017 Detecting positive selection in the genome. *BMC biology* **15**: 98.  
13  
14 Campos, J. L. and B. Charlesworth, 2019 The effects on neutral variability of recurrent selective sweeps and background selection. *Genetics* **212**: 287–303.  
15  
16 Castric, V. and X. Vekemans, 2004 Plant self-incompatibility in natural populations: a critical assessment of recent theoretical and empirical advances. *Molecular Ecology* **13**: 2873–2889.  
17  
18 Charlesworth, B., 2009 Effective population size and patterns of molecular evolution and variation. *Nature Reviews Genetics* **10**: 195–205.  
19  
20 Charlesworth, B., 2020 How long does it take to fix a favorable mutation, and why should we care? *The American Naturalist* **195**: 753–771.  
21  
22 Charlesworth, B., 2020 How good are predictions of the effects of selective sweeps on levels of neutral diversity? *Under review*.  
23  
24 Charlesworth, B. and D. Charlesworth, 2010 *Elements of Evolutionary Genetics*. Roberts and Company Publishers, Greenwood Village (Colorado).  
25  
26 Charlesworth, B., M. Nordborg, and D. Charlesworth, 1997 The effects of local selection, balanced polymorphism and background selection on equilibrium patterns of genetic diversity in subdivided populations. *Genetical Research* **70**: 155–174.  
27  
28 Charlesworth, D., 2006 Balancing selection and its effects on sequences in nearby genome regions. *PLoS Genetics* **2**: 379–384.  
29  
30 Cheng, X. H. and M. DeGiorgio, 2019 Detection of shared balancing selection in the absence of trans-species polymorphism. *Molecular Biology and Evolution* **36**: 177–199.  
31  
32 Comeron, J. M., 2017 Background selection as null hypothesis in population genomics: insights and challenges from drosophila studies. *Philosophical Transactions of the Royal Society B: Biological Sciences* **372**: 20160471.  
33  
34 Connallon, T. and A. G. Clark, 2014 Balancing selection in species with separate sexes: Insights from fisher's geometric model. *Genetics* **197**: 991–1006.  
35  
36 Coop, G. and P. Ralph, 2012 Patterns of neutral diversity under general models of selective sweeps. *Genetics* **192**: 205–224.  
37  
38 Corbett-Detig, R. B. and D. L. Hartl, 2012 Population genomics of inversion polymorphisms in drosophila melanogaster. *PLoS Genet* **8**: e1003056.  
39  
40 Corbett-Detig, R. B., D. L. Hartl, and T. B. Sackton, 2015 Natural selection constrains neutral diversity across a wide range of species. *PLoS Biol* **13**: e1002112.  
41  
42 Crow, J. F., M. Kimura, *et al.*, 1970 *An introduction to population genetics theory*. New York, Evanston and London: Harper & Row, Publishers.  
43  
44 DeGiorgio, M., K. E. Lohmueller, and R. Nielsen, 2014 A model-based approach for identifying signatures of ancient balancing selection in genetic data. *PLoS Genetics* **10**: e1004561.  
45  
46 Desai, M. M. and D. S. Fisher, 2007 Beneficial mutation selection balance and the effect of linkage on positive selection. *Genetics* **176**: 1759–98.  
47  
48 Dobzhansky, T., 1970 *Genetics of the evolutionary process*. Columbia University Press, New York, fourth edition.  
49  
50 Durrett, R. and J. Schweinsberg, 2004 Approximating selective sweeps. *Theoretical population biology* **66**: 129–138.  
51  
52 Eanes, W. F., 1999 Analysis of selection on enzyme polymorphisms. *Annual Review of Ecology and Systematics* **30**: 301–326.  
53  
54 Elyashiv, E., S. Sattath, T. T. Hu, A. Strutsovsky, G. McVicker, *et al.*, 2016 A genomic map of the effects of linked selection in drosophila. *PLoS genetics* **12**: e1006130.  
55  
56 Ewing, G., J. Hermisson, P. Pfaffelhuber, and J. Rudolf, 2010 Selective sweeps for recessive alleles and for other modes of dominance. *Journal of Mathematical Biology* **63**: 399–431.  
57  
58 Ferrer-Admetlla, A., M. Liang, T. Korneliussen, and R. Nielsen, 2014 On detecting incomplete soft or hard selective sweeps using haplotype structure. *Molecular biology and evolution* **31**: 1275–1291.  
59  
60 Fijarczyk, A. and W. Babik, 2015 Detecting balancing selection in genomes: limits and prospects. *Molecular Ecology* **24**: 3529–3545.  
61  
62 Fisher, R. A., 1922 On the dominance ratio. *Proceedings of the Royal Society of Edinburgh* **42**: 321–341.  
63  
64 Gilbert, K. J., F. Pouyet, L. Excoffier, and S. Peischl, 2020 Transition from background selection to associative overdominance promotes diversity in regions of low recombination. *Current Biology* **30**: 101–107 e3.  
65  
66 Glémin, S., 2012 Extinction and fixation times with dominance and inbreeding. *Theoretical Population Biology* **81**: 310–316.  
67  
68 Hartfield, M. and T. Bataillon, 2020 Selective sweeps under dominance and inbreeding. *G3* **10**: 1063–1075.  
69  
70 Hedrick, P. W., 2011 Population genetics of malaria resistance in humans. *Heredity* **107**: 283–304.  
71  
72 Hobolth, A., A. Siri-Jegousse, and M. Bladt, 2019 Phase-type distributions in population genetics. *Theoretical Population Biology* **127**: 16–32.  
73  
74 Hudson, R. R. and N. L. Kaplan, 1988 The coalescent process in models with selection and recombination. *Genetics* **120**: 831–840.  
75  
76 Innan, H. and M. Nordborg, 2003 The extent of linkage disequilibrium and haplotype sharing around a polymorphic site. *Genetics* **165**: 437–444.  
77  
78 Johnston, S. E., J. Gratten, C. Berenos, J. G. Pilkington, T. H. Clutton-Brock, *et al.*, 2013 Life history trade-offs at a single locus maintain sexually selected genetic variation. *Nature* **502**: 93–95.  
79  
80 Johri, P., B. Charlesworth, and J. D. Jensen, 2020 Toward an evolutionarily appropriate null model: Jointly inferring demography and purifying selection. *Genetics* **215**: 173–192.  
81  
82 Kaplan, N. L., T. Darden, and R. R. Hudson, 1988 The coalescent process in models with selection. *Genetics* **120**: 819–829.  
83  
84 Kaplan, N. L., R. R. Hudson, and C. H. Langley, 1989 The "hitchhiking effect" revisited. *Genetics* **123**: 887–899.  
85  
86 Kern, A. D. and J. Hey, 2017 Exact calculation of the joint allele frequency spectrum for isolation with migration models. *Genetics* **207**: 241–253.  
87  
88 Kim, K. W., B. C. Jackson, H. Zhang, D. P. L. Toews, S. A. Taylor,

- 1 *et al.*, 2019 Genetics and evidence for balancing selection of a  
2 sex-linked colour polymorphism in a songbird. *Nat Commun*  
3 **10**: 1852.
- 4 Kim, Y., 2006 Allele frequency distribution under recurrent se-  
5 lective sweeps. *Genetics* **172**: 1967–1978.
- 6 Kim, Y. and R. Nielsen, 2004 Linkage disequilibrium as a signa-  
7 ture of selective sweeps. *Genetics* **167**: 1513–1524.
- 8 Kim, Y. and W. Stephan, 2002 Detecting a local signature of ge-  
9 netic hitchhiking along a recombining chromosome. *Genetics*  
10 **160**: 765–777.
- 11 Kimura, M., 1969 The number of heterozygous nucleotide sites  
12 maintained in a finite population due to steady flux of muta-  
13 tions. *Genetics* **61**: 893–903.
- 14 Kupper, C., M. Stocks, J. E. Risse, N. Dos Remedios, L. L. Farrell,  
15 *et al.*, 2016 A supergene determines highly divergent male  
16 reproductive morphs in the ruff. *Nature Genetics* **48**: 79–83.
- 17 Kwiatkowski, D. P., 2005 How malaria has affected the human  
18 genome and what human genetics can teach us about malaria.  
19 *The American Journal of Human Genetics* **77**: 171–192.
- 20 Leffler, E. M., Z. Gao, S. Pfeifer, L. Segurel, A. Auton, *et al.*,  
21 2013 Multiple instances of ancient balancing selection shared  
22 between humans and chimpanzees. *Science* **339**: 1578–1582.
- 23 Matuszewski, S., M. E. Hildebrandt, G. Achaz, and J. D. Jensen,  
24 2017 Coalescent processes with skewed offspring distributions  
25 and nonequilibrium demography. *Genetics* **208**: 323–338.
- 26 Maynard Smith, J., 1976 What determines the rate of evolution?  
27 *American Naturalist* **110**: 331–338.
- 28 Maynard Smith, J. and J. Haigh, 1974 The hitch-hiking effect of a  
29 favourable gene. *Genetics Research* **23**: 23–35.
- 30 McVean, G. A., 2002 A genealogical interpretation of linkage  
31 disequilibrium. *Genetics* **162**: 987–991.
- 32 Moler, C. and C. Van Loan, 2003 Nineteen dubious ways to  
33 compute the exponential of a matrix, twenty-five years later.  
34 *SIAM review* **45**: 3–49.
- 35 Nagylaki, T., 1980 The strong-migration limit in geographically  
36 structured populations. *Journal of mathematical biology* **9**:  
37 101–114.
- 38 Nicolaisen, L. E. and M. M. Desai, 2013 Distortions in genealog-  
39 ies due to purifying selection and recombination. *Genetics*  
40 **195**: 221–230.
- 41 Nordborg, M., 1997 Structured coalescent processes on different  
42 time scales. *Genetics* **146**: 1501–1514.
- 43 Ohta, T. and M. Kimura, 1971 Linkage disequilibrium between  
44 two segregating nucleotide sites under the steady flux of mu-  
45 tations in a finite population. *Genetics* **68**: 571.
- 46 Pavlidis, P. and N. Alachiotis, 2017 A survey of methods and  
47 tools to detect recent and strong positive selection. *Journal of*  
48 *Biological Research-Thessaloniki* **24**.
- 49 Pennings, P. S. and J. Hermisson, 2006 Soft sweeps ii—molecular  
50 population genetics of adaptation from recurrent mutation or  
51 migration. *Molecular Biology and Evolution* **23**: 1076–1084.
- 52 Polanski, A. and M. Kimmel, 2003 New explicit expressions  
53 for relative frequencies of single-nucleotide polymorphisms  
54 with application to statistical inference on population growth.  
55 *Genetics* **165**: 427–436.
- 56 Sellis, D., B. J. Callahan, D. A. Petrov, and P. W. Messer, 2011 Het-  
57 erozygote advantage as a natural consequence of adaptation  
58 in diploids. *Proceedings of the National Academy of Sciences*  
59 *of the United States of America* **108**: 20666–20671.
- 60 Siewert, K. M. and B. F. Voight, 2020 Betascan2: Standardized  
61 statistics to detect balancing selection utilizing substitution  
62 data. *Genome Biology and Evolution* p. in the press.
- Slatkin, M., 1991 Inbreeding coefficients and coalescence times. *63*  
*Genetical Research* **58**: 167–175. *64*
- Spurgin, L. G. and D. S. Richardson, 2010 How pathogens drive *65*  
genetic diversity: Mhc, mechanisms and misunderstandings. *66*  
*Proceedings of the Royal Society B: Biological Sciences* **277**:  
67 979–988. *68*
- Stephan, W., T. H. E. Wiehe, and M. W. Lenz, 1992 The effect *69*  
of strongly selected substitutions on neutral polymorphism -  
70 analytical results based on diffusion-theory. *Theoretical Popu-*  
71 *lation Biology* **41**: 237–254. *72*
- Strobeck, C., 1983 Expected linkage disequilibrium for a neutral *73*  
locus linked to a chromosomal arrangement. *Genetics* **103**:  
74 545–555. *75*
- Tajima, F., 1989 Statistical method for testing the neutral muta- *76*  
tion hypothesis by dna polymorphism. *Genetics* **123**: 585–595. *77*
- Takahata, N., 1990 A simple genealogical structure of strongly *78*  
balanced allelic lines and trans-species evolution of polymor-  
79 phism. *Proceedings of the National Academy of Sciences of*  
80 *the United States of America* **87**: 2419–2423. *81*
- Takahata, N. and M. Nei, 1990 Allelic genealogy under overdomi- *82*  
nant and frequency-dependent selection and polymorphism  
83 of major histocompatibility complex loci. *Genetics* **124**: 967–  
84 978. *85*
- Takahata, N. and Y. Satta, 1998 Footprints of intragenic recombi- *86*  
nation at hla loci. *Immunogenetics* **47**: 430–441. *87*
- van Diepen, L. T., Å. Olson, K. Ihrmark, J. Stenlid, and T. Y. James, *88*  
2013 Extensive trans-specific polymorphism at the mating  
89 type locus of the root decay fungus heterobasidium. *Molecular*  
90 *Biology and Evolution* **30**: 2286–2301. *91*
- Vekemans, X. and M. Slatkin, 1994 Gene and allelic genealogies *92*  
at a gametophytic self-incompatibility locus. *Genetics* **137**:  
93 1157–65. *94*
- Vicoso, B. and B. Charlesworth, 2009 Effective population size *95*  
and the faster-x effect: An extended model. *Evolution* **63**:  
96 2413–2426. *97*
- Voight, B. F., S. Kudaravalli, X. Wen, and J. K. Pritchard, 2006 A *98*  
map of recent positive selection in the human genome. *PLoS*  
99 *biology* **4**. *100*
- Vy, H. M. T. and Y. Kim, 2015 A composite-likelihood method *101*  
for detecting incomplete selective sweep from population  
102 genomic data. *Genetics* **200**: 633–649. *103*
- Waltoft, B. L. and A. Hobolth, 2018 Non-parametric estimation *104*  
of population size changes from the site frequency spectrum.  
105 *Statistical Applications in Genetics and Molecular Biology* **17**. *106*
- Watterson, G., 1975 On the number of segregating sites in ge- *107*  
netical models without recombination. *Theoretical Population*  
108 *Biology* **7**: 256–276. *109*
- Zeng, K., 2013 A coalescent model of background selection with *110*  
recombination, demography and variation in selection coeffi-  
111 cients. *Heredity* **110**: 363–371. *112*
- Zeng, K. and P. Corcoran, 2015 The effects of background and *113*  
interference selection on patterns of genetic variation in sub-  
114 divided populations. *Genetics* **201**: 1539–54. *115*
- Zeng, K., Y.-X. Fu, S. Shi, and C.-I. Wu, 2006 Statistical tests *116*  
for detecting positive selection by utilizing high-frequency  
117 variants. *Genetics* **174**: 1431–1439. *118*



## Supplementary text

### S.1 The intensity matrix for calculating the total branch length of a sample size of three

$S_2$  and  $s_2$  in (10) are the same as the corresponding elements defined in (3).

$$S_3 = \begin{pmatrix} -3M_{21} - \frac{3}{\hat{p}_2} & 3M_{21} & 0 & 0 \\ M_{12} & -M_{12} - 2M_{21} - \frac{1}{\hat{p}_2} & 2M_{21} & 0 \\ 0 & 2M_{12} & -2M_{12} - M_{21} - \frac{1}{\hat{p}_1} & M_{21} \\ 0 & 0 & 3M_{12} & -3M_{12} - \frac{3}{\hat{p}_1} \end{pmatrix} \quad (S1)$$

and

$$S_{32} = \begin{pmatrix} \frac{3}{\hat{p}_2} & 0 & 0 \\ 0 & \frac{1}{\hat{p}_2} & 0 \\ 0 & \frac{1}{\hat{p}_1} & 0 \\ 0 & 0 & \frac{3}{\hat{p}_1} \end{pmatrix}. \quad (S2)$$

### S.2 The intensity matrix for calculating the SFS for a sample size of three

The sub-matrices in (10) for the model leading to Table 1 are given below.

$$S_3 = \begin{pmatrix} -3M_{21} - \frac{3}{\hat{p}_2} & 3M_{21} & 0 & 0 \\ M_{12} & -M_{12} - 2M_{21} - \frac{1}{\hat{p}_2} & 2M_{21} & 0 \\ 0 & 2M_{12} & -2M_{12} - M_{21} - \frac{1}{\hat{p}_1} & M_{21} \\ 0 & 0 & 3M_{12} & -3M_{12} - \frac{3}{\hat{p}_1} \end{pmatrix}. \quad (S3)$$

$$S_{32} = \begin{pmatrix} \frac{3}{\hat{p}_2} & 0 & 0 & 0 \\ 0 & \frac{1}{\hat{p}_2} & 0 & 0 \\ 0 & 0 & \frac{1}{\hat{p}_1} & 0 \\ 0 & 0 & 0 & \frac{3}{\hat{p}_1} \end{pmatrix}. \quad (S4)$$

$$S_2 = \begin{pmatrix} -2M_{21} - \frac{1}{\hat{p}_2} & M_{21} & M_{21} & 0 \\ M_{12} & -M_{12} - M_{21} & 0 & M_{21} \\ M_{12} & 0 & -M_{12} - M_{21} & M_{21} \\ 0 & M_{12} & M_{12} & -2M_{12} - \frac{1}{\hat{p}_1} \end{pmatrix}. \quad (S5)$$

$$s_2^T = \left( \frac{1}{\hat{p}_2} \quad 0 \quad 0 \quad \frac{1}{\hat{p}_1} \right). \quad (S6)$$

### S.3 A non-equilibrium phase-type model

Consider a continuous time Markov chain with finite state space  $\{1, 2, \dots, K, K+1\}$ , where states  $1, \dots, K$  are transient, and state  $K+1$  is absorbing. It is assumed that the time interval  $[0, \infty)$  is subdivided into  $H$  non-overlapping epochs. The duration of epoch  $h$  is  $[t_{h-1}, t_h)$ , where  $1 \leq h \leq H$ ,  $t_0 = 0$ , and  $t_H = \infty$ . The intensity matrix for epoch  $h$  is constant and takes the form:

$$\mathbf{\Lambda}_h = \begin{pmatrix} \mathbf{S}_h & \mathbf{s}_h \\ \vec{0} & 0 \end{pmatrix} \quad (\text{S7})$$

where  $\mathbf{S}_h$  the  $K$ -by- $K$  sub-intensity matrix, and  $\mathbf{s}_h$  is the  $K$ -by-1 exit rate vector.

Define

$$\begin{cases} d_h = t_h - t_{h-1} \\ \mathfrak{h}(t) = \min\{h : 1 \leq h \leq H \text{ and } t_{h-1} \leq t < t_h\} \\ d_{\mathfrak{h}(t)} = t - t_{\mathfrak{h}(t)-1} \end{cases} \quad (\text{S8})$$

The transition probability between time 0 and time  $t$  is given by:

$$\mathbf{P}(t) = \left[ \prod_{h=1}^{\mathfrak{h}(t)-1} \mathbf{P}_h(d_h) \right] \mathbf{P}_{\mathfrak{h}(t)}(d_{\mathfrak{h}(t)}) \quad (\text{S9})$$

where  $\mathbf{P}_h(t)$  is the transition matrix for epoch  $h$ . From standard Markov chain theory, we know that:

$$\mathbf{P}_h(t) = \begin{pmatrix} e^{\mathbf{S}_h t} & \vec{1} - e^{\mathbf{S}_h t} \vec{1} \\ \vec{0} & 1 \end{pmatrix}. \quad (\text{S10})$$

Define

$$\mathbf{S}(t) = \left[ \prod_{h=1}^{\mathfrak{h}(t)-1} e^{\mathbf{S}_h d_h} \right] e^{\mathbf{S}_{\mathfrak{h}(t)} d_{\mathfrak{h}(t)}}. \quad (\text{S11})$$

We can rewrite (S9) in a more compact form:

$$\mathbf{P}(t) = \begin{pmatrix} \mathbf{S}(t) & \vec{1} - \mathbf{S}(t) \vec{1} \\ \vec{0} & 1 \end{pmatrix}. \quad (\text{S12})$$

The probability that the process jumps to the absorbing state in the time interval  $[t, t+dt)$  is given by:

$$f(t)dt = \sum_{i=1}^K \alpha_i \sum_{j=1}^K s_{ij}(t) s_j(t) dt = \boldsymbol{\alpha} \mathbf{S}(t) \mathbf{s}(t) dt \quad (\text{S13})$$

where  $s_{ij}(t)$  are elements of  $\mathbf{S}(t)$ , and  $s_j(t)$  are elements of  $\mathbf{s}_{\mathfrak{h}(t)}$ , the exit rate vector at time  $t$ . The Laplace transform of  $f(t)$  is defined as:

$$\mathcal{L}(z) = \int_0^{\infty} e^{-zt} \boldsymbol{\alpha} \mathbf{S}(t) \mathbf{s}(t) dt \quad (\text{S14})$$

Noting that  $\mathbf{s}_h = -\mathbf{S}_h \vec{\mathbf{1}}$  and substituting (S11) into (S14) leads to:

$$\mathcal{L}(z) = -\boldsymbol{\alpha} \sum_{h=1}^H \left[ \prod_{i=1}^{h-1} e^{\mathbf{S}_i d_i} \right] \left[ \int_{t_{h-1}}^{t_h} e^{-(z\mathbf{I} - \mathbf{S}_h)t} dt \right] e^{-\mathbf{S}_h t_{h-1}} \mathbf{S}_h \vec{\mathbf{1}}, \quad (\text{S15})$$

where  $\mathbf{I}$  is the identity matrix. To evaluate the integral, we define  $\mathbf{A}_h(z) = \mathbf{A}_h = -(z\mathbf{I} - \mathbf{S}_h)$ . Because all eigenvalues of  $\mathbf{A}_h$  have strictly negative real parts (Hobolth *et al.*, 2019),  $\lim_{t \rightarrow \infty} e^{\mathbf{A}_h t} = 0$ . We obtain:

$$\int_{t_{h-1}}^{t_h} e^{\mathbf{A}_h t} dt = \mathbf{A}_h^{-1} (e^{\mathbf{A}_h t_h} - e^{\mathbf{A}_h t_{h-1}}). \quad (\text{S16})$$

Taking the derivative with respect to  $z$ , we obtain:

$$\frac{d}{dz} \int_{t_{h-1}}^{t_h} e^{\mathbf{A}_h t} dt = \mathbf{A}_h^{-1} [(\mathbf{A}_h^{-1} - t_h \mathbf{I}) e^{\mathbf{A}_h t_h} - (\mathbf{A}_h^{-1} - t_{h-1} \mathbf{I}) e^{\mathbf{A}_h t_{h-1}}]. \quad (\text{S17})$$

Noting that the mean time to absorption is given by  $-\frac{d\mathcal{L}(z)}{dz} \Big|_{z=0}$  and that  $\mathbf{A}_h(0) = \mathbf{S}_h$ , we have:

$$\mathbb{E}[\mathcal{T}] = \boldsymbol{\alpha} \sum_{h=1}^H \left[ \prod_{i=1}^{h-1} e^{\mathbf{S}_i d_i} \right] [(\mathbf{S}_h^{-1} - t_h \mathbf{I}) e^{\mathbf{S}_h d_h} + t_{h-1} \mathbf{I} - \mathbf{S}_h^{-1}] \vec{\mathbf{1}}. \quad (\text{S18})$$

Rearranging the equation, we arrive at Theorem 1. To facilitate further discussion, we state this Theorem in a slightly different way:

**Corollary 1.** *Let  $\boldsymbol{\alpha} = (\alpha_1, \dots, \alpha_K)$ , where  $\alpha_i$  is the probability that the initial state is  $i$  and  $\sum_{i=1}^K \alpha_i = 1$ . Let  $\mathcal{T}$  be a random variable representing the time to absorption. We have:*

$$\mathbb{E}[\mathcal{T}] = \boldsymbol{\alpha} \mathbf{U} \vec{\mathbf{1}} \quad (\text{S19})$$

where

$$\begin{cases} \mathbf{U} = \sum_{h=1}^H \left[ \prod_{i=1}^{h-1} e^{\mathbf{S}_i d_i} \right] \mathbf{U}_h \\ \mathbf{U}_h = e^{\mathbf{S}_h d_h} \mathbf{S}_h^{-1} - \mathbf{S}_h^{-1} \end{cases} \quad (\text{S20})$$

and  $e^{\mathbf{S}_h d_h} = 0$  if  $d_h = \infty$ .

We have also derived an expression for the second moment of  $\mathcal{T}$  in Theorem 2 in Supplementary Text S.4.

Let  $u_{ij,h}$  represent the elements of  $\mathbf{U}_h$ .  $u_{ij,h}$  is the amount of time the process spends in state  $j$  during  $[t_{h-1}, t_h]$  given that it is in state  $i$  at time  $t_{h-1}$ . That is,  $\mathbf{U}_h$  is the Green's matrix for the  $h$ -th epoch. Also note that element  $i$  in the vector  $\boldsymbol{\alpha} \prod_{j=1}^{h-1} e^{\mathbf{S}_j d_j}$  gives the probability that the process is in state  $i$  at time  $t_{h-1}$ . Thus, Corollary 1 shows that, under this stepwise model, the Green's matrix for the entire process  $\mathbf{U}$  is the weighted average of the Green's matrices of all the constituent epochs.

As noted in the main text, the expectation of both  $L_{n_1, n_2}$  and  $\phi^{(n_1, n_2)}$  can be written in the form  $\boldsymbol{\alpha} \mathbf{U} \mathbf{D}$ . Let  $Y$  represent either of these two random variables. Corollary 1 tells us that:

$$\mathbb{E}[Y] = \sum_{h=1}^H \mathbb{E}[Y_h] \quad (\text{S21})$$

where

$$\mathbb{E}[Y_h] = \boldsymbol{\alpha} \left[ \prod_{i=1}^{h-1} e^{\mathbf{S}_i d_i} \right] \mathbf{U}_h \mathbf{D} \quad (\text{S22})$$

which is the expected contribution from epoch  $h$ .

We have so far assumed that the state space is the same across epochs. This restriction can be relaxed. Let the size of the state space in epoch  $h$  be  $K_h$ . Let  $\mathbf{E}_{h-1,h}$  be a  $K_{h-1}$ -by- $K_h$  matrix that defines the mapping of the states from epoch  $h-1$  to epoch  $h$  ( $h = 1, \dots, H$  and  $E_{01} = \mathbf{I}$ , the identity matrix). Corollary 1 holds if we replace  $\prod_{i=1}^{h-1} e^{\mathbf{S}_i d_i}$  by  $(\prod_{i=1}^{h-1} \mathbf{E}_{i-1,i} e^{\mathbf{S}_i d_i}) \mathbf{E}_{h-1,h}$ . For (S21), we additionally need to replace  $\mathbf{D}$  by an epoch-specific  $\mathbf{D}_h$ .

## S.4 The second moment of the mean time to absorption

The second moment of  $\mathcal{T}$  is given by  $\frac{d^2 \mathcal{L}(z)}{dz^2} \Big|_{z=0}$ . The second derivative with respect to  $z$  for the integral in (S16) reads:

$$\frac{d^2}{dz^2} \int_{t_{h-1}}^{t_h} e^{\mathbf{A}_h t} dt = \mathbf{A}_h^{-1} \sum_{k=0}^1 (-1)^k e^{\mathbf{A}_h t_{h-k}} [\mathbf{A}_h^{-2} + (\mathbf{A}_h^{-1} - t_{h-k} \mathbf{I})^2] \quad (\text{S23})$$

Substituting (S23) into (S15) leads to the following result.

**Theorem 2.** *The second moment of the mean time to absorption,  $\mathbb{E}[\mathcal{T}^2]$ , is given by:*

$$\boldsymbol{\alpha} \sum_{h=1}^H \left[ \prod_{i=1}^{h-1} e^{\mathbf{S}_i d_i} \right] \sum_{k=0}^1 (-1)^{k+1} e^{\mathbf{S}_h (t_{h-k} - t_{h-1})} [\mathbf{S}_h^{-2} + (\mathbf{S}_h^{-1} - t_{h-k} \mathbf{I})^2] \vec{\mathbf{1}}. \quad (\text{S24})$$

## S.5 Approximating the expected pairwise coalescence time under the model of recent balancing selection

As in the main text, we assume that a new allele  $A_2$  has arisen by mutation, and has spread to a frequency  $\tilde{p}_2$  that is close to its equilibrium value under balancing selection, which is  $\hat{p}_2 = s_1 / (s_1 + s_2)$  with heterozygote advantage. Providing that the recombination rate is not too high relative to the strength of selection, the expected coalescence time for a pair of  $A_2$  alleles sampled at frequency  $\tilde{p}_2$  can be obtained from Equations 9, 10, 11a and A1-A3 of Charlesworth (*under review*), where  $\Delta\pi$  in his Equation 11a is equivalent to the reduction in the mean pairwise coalescence time relative to the neutral value of  $2N_e$  generations. To obtain  $\Delta\pi$ ,  $\tilde{p}_2$  replaces  $q_2$  in Equations 9, 10 and A1-A3 of Charlesworth (*under review*), where the selection parameters in Equations A1-A3 are  $\gamma = 2N_e s_1$ ,  $a = 1$ , and  $b = -(s_1 + s_2) / s_1$ . At the time when  $\tilde{p}_2$  is reached, the values of the expected coalescent times (on the timescale of  $2N_e$  generations) for a pair of  $A_1$  alleles is approximately equal to 1.

In addition, the possibility that a recombination event introduces the neutral site from an  $A_1$  allele onto an  $A_2$  background, thereby reducing the initial divergence at the neutral site between an  $A_1$  and  $A_2$  pair, is modelled by using Equation A3a of Charlesworth (*under review*) with  $q_2$  replaced with  $1 - p_2$  and  $q$  with  $1 - \epsilon$ , to yield a probability of an

$A_1$  to  $A_2$  recombination event of  $P_{r1}$ . In addition, the selection parameters  $a$  and  $b$  should be replaced with  $a + b$ , and  $-b$ , respectively. It is assumed that such a recombination event is followed by coalescence with a non-recombined neutral site associated with  $A_2$ , with a coalescence time equal to the duration of sweep,  $t_s$ , as given by 21 with  $p_2 = \tilde{p}_2$ . The divergence between an  $A_1$  and  $A_2$  pair at the time of sampling is then given by  $1 - P_{r1}(1 - t_s)$ .

A simple way to obtain the pairwise coalescence times at an arbitrary time after the allele frequency  $\tilde{p}_2$  has been reached is to consider the recursion relations for the corresponding pairwise expected diversity measures with a neutral mutation rate of  $u$  under the infinite sites mutation model and assuming that the frequency of  $A_2$  remains close to its equilibrium value. The scaled mutation rate in the absence of selection,  $\theta = 2N_e u$ , is sufficiently small that second-order terms in  $\theta$  can be neglected (Malécot, 1969, p. 40; Wiehe and Stephan, 1993, Equation 6a). Writing  $\pi_{ij}$  for the expected diversity for a pair of alleles  $A_i$  and  $A_j$ , and using primes for their values in a new generation, and neglecting second-order terms, we have:

$$\pi'_{11} = \left[ 1 - \left( 2u + 2r\hat{p}_2 + \frac{1}{2N_e\hat{p}_1} \right) \right] \pi_{11} + r\hat{p}_1\pi_{12} + 2u \quad (\text{S25a})$$

$$\pi'_{12} = 2r\hat{p}_2\pi_{11} + [1 - (2u + r)]\pi_{12} + 2r\hat{p}_1\pi_{22} + 2u \quad (\text{S25b})$$

$$\pi'_{22} = r\hat{p}_2\pi_{12} + \left[ 1 - \left( 2u + 2r\hat{p}_1 + \frac{1}{2N_e\hat{p}_2} \right) \right] \pi_{22} + 2u \quad (\text{S25c})$$

The coefficients of the  $\pi_{ij}$  in these equations provide the corresponding coefficients for the recursions of the deviations of the  $\pi_{ij}$  from their equilibrium values, thereby eliminating the term in  $2u$  on the right-hand sides of the equations. If the  $\pi_{ij}$  are scaled relative to their expected value  $2\theta$  in the absence of selection, and  $u$  is set arbitrarily close to zero, solving for equilibrium gives  $\pi_{ij}$  values relative to  $2\theta$  that are equivalent to the equilibrium coalescent times given by (6), as can be verified by direct calculation.

By setting  $u$  to zero in (S25), and using the scaled the  $\pi_{ij}$ , we thus obtain a recursion for the deviations from equilibrium of the corresponding expected pairwise coalescence times on the timescale of  $2N_e$  generations. While it is possible in principle to diagonalize the relevant matrix, and express the solution for an arbitrary time after reaching  $\tilde{p}_2$  in term of its eigenvalues and eigenvectors, in practice it is simpler to iterate the matrix with assigned numerical values of the parameters. In order to save computation time, a relatively small value of  $N_e$  can be used, and the recombination parameters rescaled accordingly to represent a much larger  $N_e$  with the same value of  $\rho = 2N_e r$ . The initial relative values of  $\pi_{11}$ ,  $\pi_{12}$ , and  $\pi_{22}$  are 1, 1, and  $1 - \Delta\pi$ .

## References

- Charlesworth, B., 2020 How good are predictions of the effects of selective sweeps on levels of neutral diversity? *Under review*.
- Hobolth, A., A. Siri-Jegousse, and M. Bladt, 2019 Phase-type distributions in population genetics. *Theoretical Population Biology* **127**: 16–32.
- Malécot, G., 1969 *The mathematics of heredity*. Freeman.

bioRxiv preprint doi: <https://doi.org/10.1101/2020.07.06.189837>; this version posted July 7, 2020. The copyright holder for this preprint (which was not certified by peer review) is the author/funder, who has granted bioRxiv a license to display the preprint in perpetuity. It is made available under a [CC-BY-ND 4.0 International license](#).

Wiehe, T. H. and W. Stephan, 1993 Analysis of a genetic hitchhiking model, and its application to dna polymorphism data from drosophila melanogaster. *Mol Biol Evol* **10**: 842–854.

## Supplementary figures

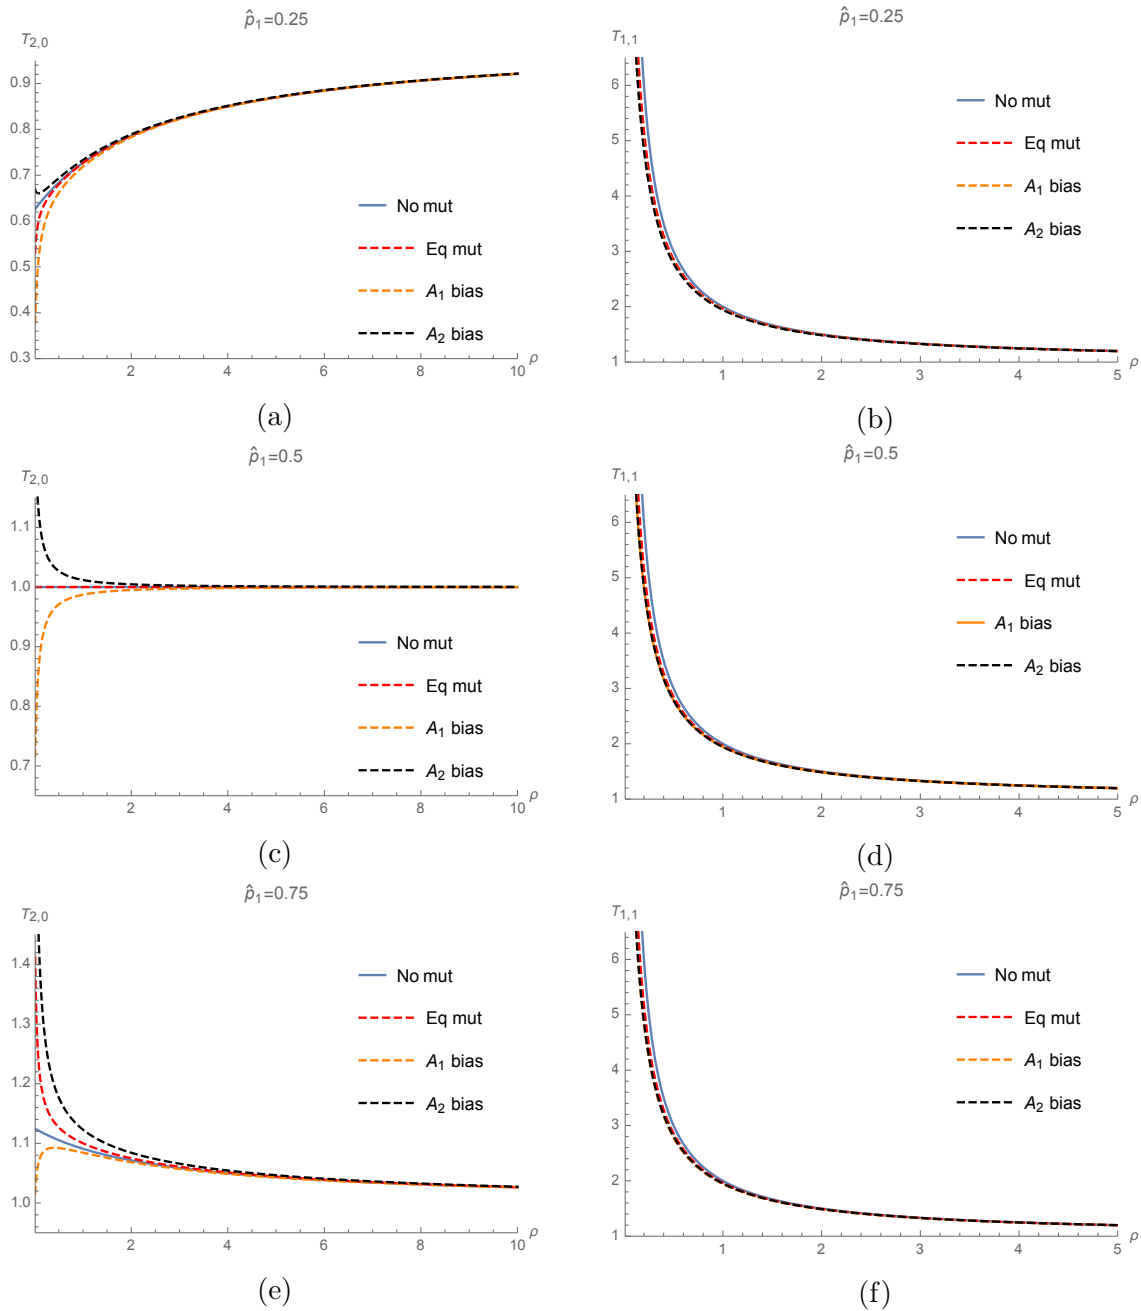

Figure S1: Expected coalescence time for a pair of alleles as a function of  $\rho$ . The selected alleles  $A_1$  and  $A_2$  are at equilibrium frequencies  $\hat{p}_1$  and  $1 - \hat{p}_1$ . “No mut” means  $\mu_{ij} = 0$  (i.e., (6)). “Eq mut” means  $\mu_{ij} = 0.02$ . “A<sub>1</sub> bias” means  $\mu_{12} = 0.01$  and  $\mu_{21} = 0.05$ . “A<sub>2</sub> bias” means  $\mu_{12} = 0.05$  and  $\mu_{21} = 0.01$ . The scales of the axes are different.

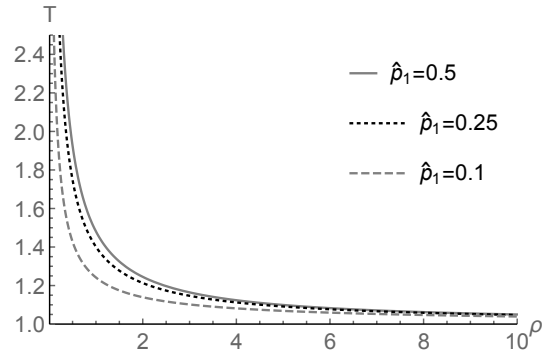

(a) Equal mutation rate

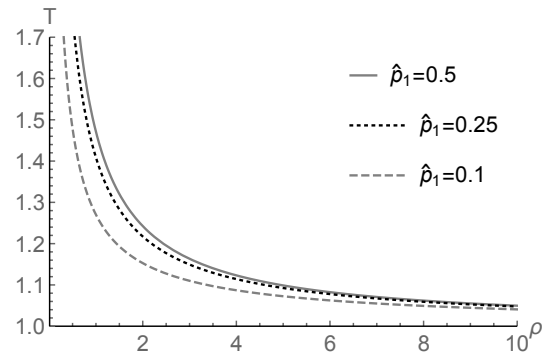

(b)  $A_1$  bias

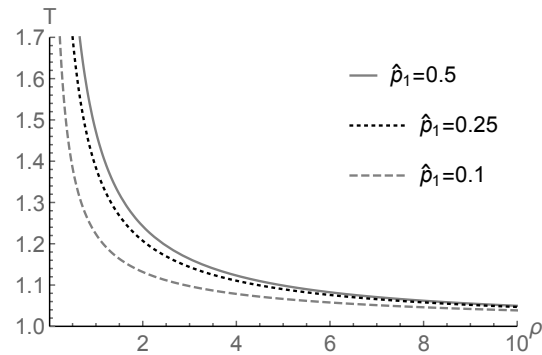

(c)  $A_2$  bias

Figure S2: Expected coalescence time for a pair of alleles as a function of  $\rho$ . The selected alleles  $A_1$  and  $A_2$  are at equilibrium frequencies  $\hat{p}_1$  and  $1 - \hat{p}_1$ . “Equal mutation rate” means  $\mu_{ij} = 0.02$ . “ $A_1$  bias” means  $\mu_{12} = 0.01$  and  $\mu_{21} = 0.05$ . “ $A_2$  bias” means  $\mu_{12} = 0.05$  and  $\mu_{21} = 0.01$ .



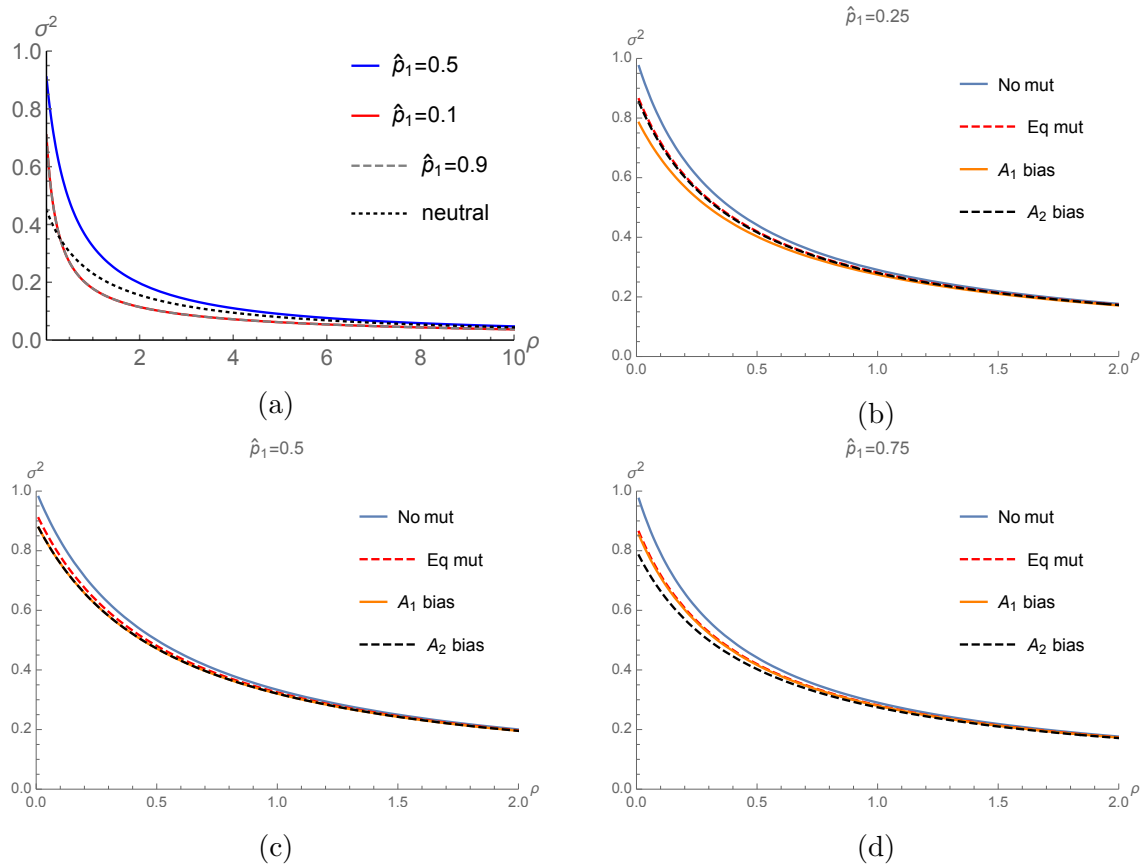

Figure S3: The level of LD between the selected and neutral loci as a function of  $\rho$ . In (a), the mutation rates between  $A_1$  and  $A_2$  are  $\mu_{12} = \mu_{21} = 0.02$ . In (b) - (d), for a given  $\hat{p}_1$ , different mutation rates are considered. “No mut” means  $\mu_{ij} = 0$ . “Eq mut” means  $\mu_{ij} = 0.02$ . “ $A_1$  bias” means  $\mu_{12} = 0.01$  and  $\mu_{21} = 0.05$ . “ $A_2$  bias” means  $\mu_{12} = 0.05$  and  $\mu_{21} = 0.01$ .

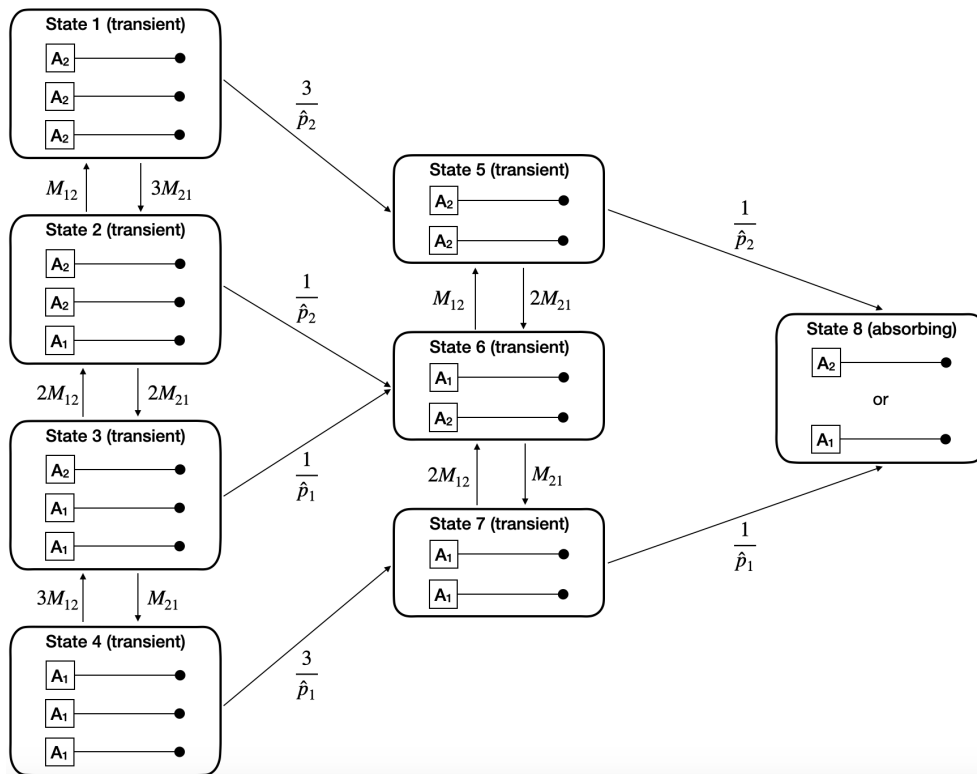

Figure S4: Transition rates between the states of the equilibrium balancing selection model for a sample of size three. Time is scaled in units of  $2N_e$  generations. The neutral locus is represented by a black dot.

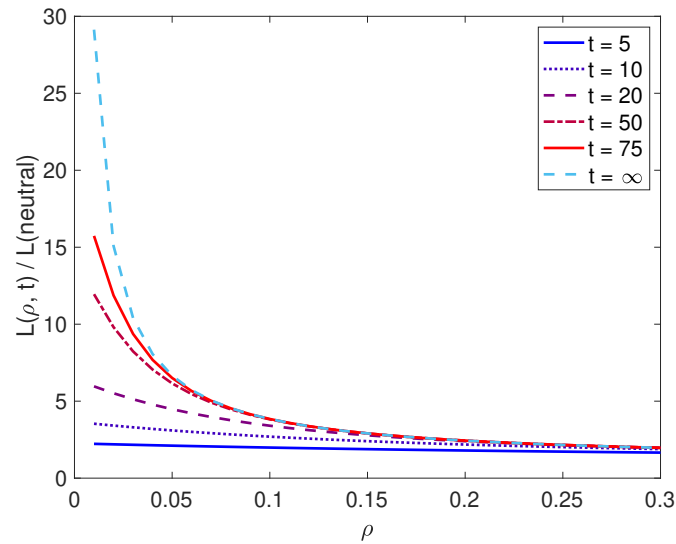

(a)

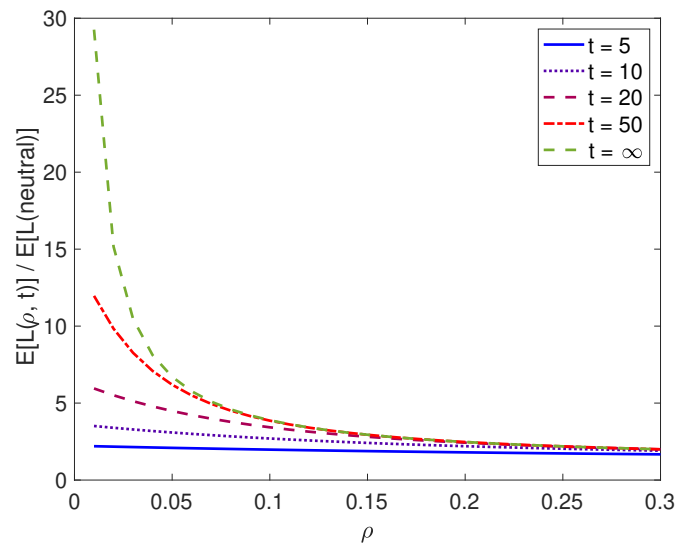

(b)

Figure S5: The approach to equilibrium diversity level. The parameters are the same as those used in Figures 6 and 8. The sample size is 20.  $\hat{p}_2 = 0.75$  in (a) and 0.5 in (b). Note that the curves are based on a model without reversible mutation between the two selected variants  $A_1$  and  $A_2$ . They overestimate the increase in diversity when  $\rho$  is very small.

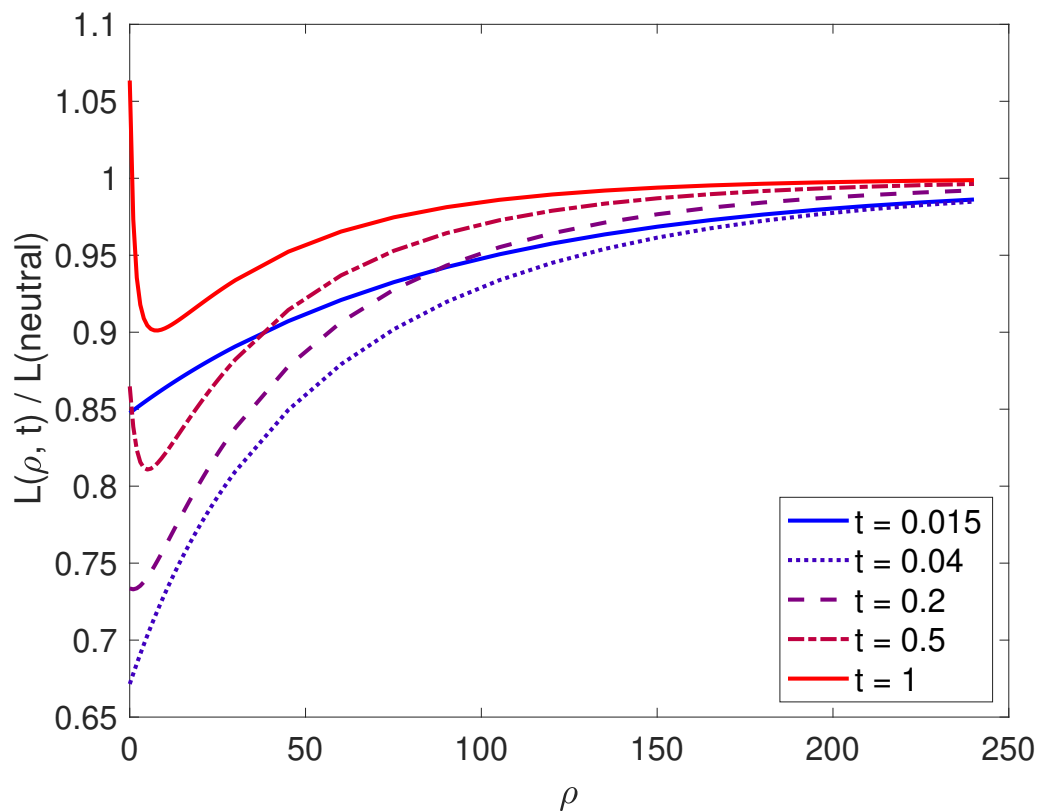

Figure S6: Neutral diversity in genomic regions surrounding a recently-emerged variant under balancing selection. The parameters are the same as in Figure 8 in the main text, except that the sample size is  $n = 20$ .

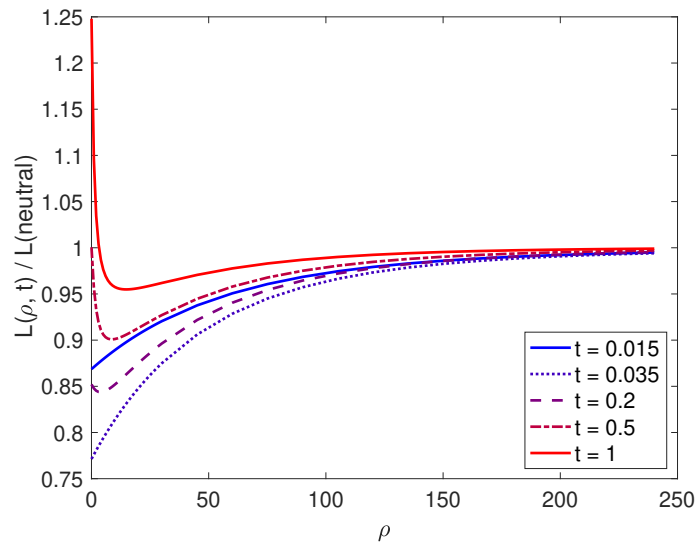

(a)

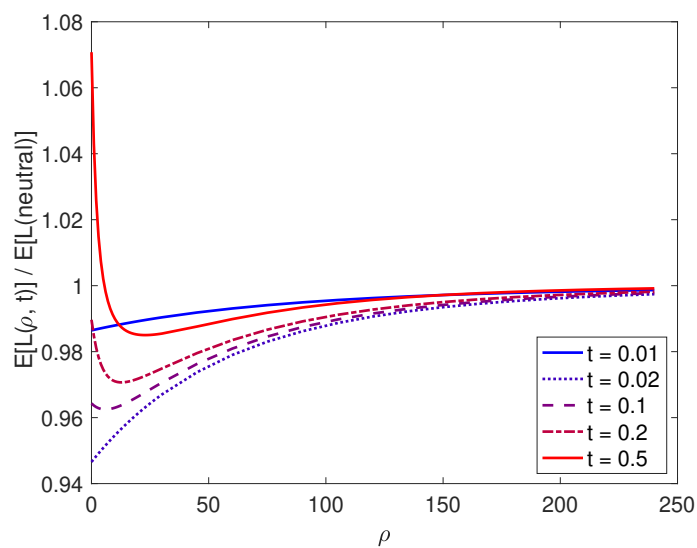

(b)

Figure S7: Neutral diversity level in genomic regions surrounding a recently-emerged balanced polymorphism. These figures are analogous to that in Figure 8, except that in (a)  $\hat{p}_2 = 0.5$  and in (b)  $\hat{p}_2 = 0.25$ . The sample size is two.

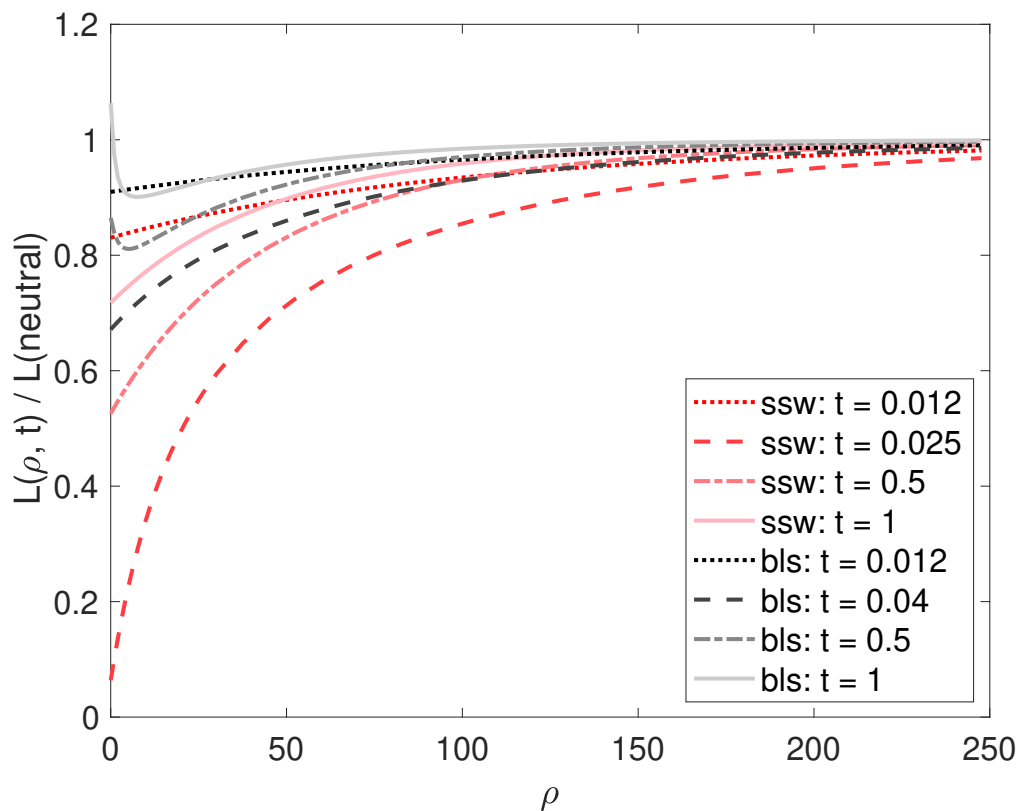

Figure S8: Comparing recent balancing selection with the corresponding sweep model with respect to their effects on diversity levels in surrounding genomic regions. The models and their parameters are the same as those in Figure 9, except that  $n = 20$ .

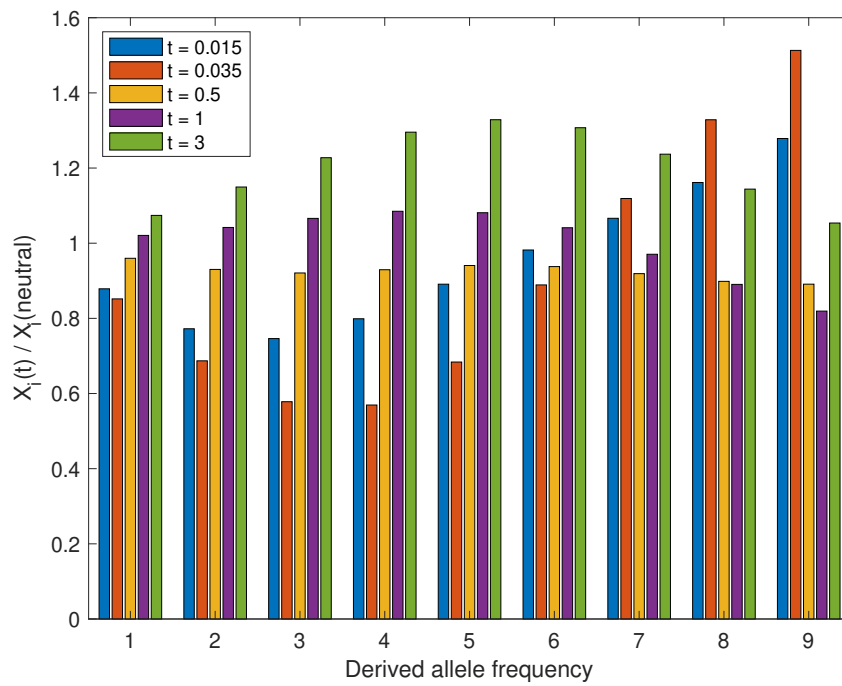

(a)

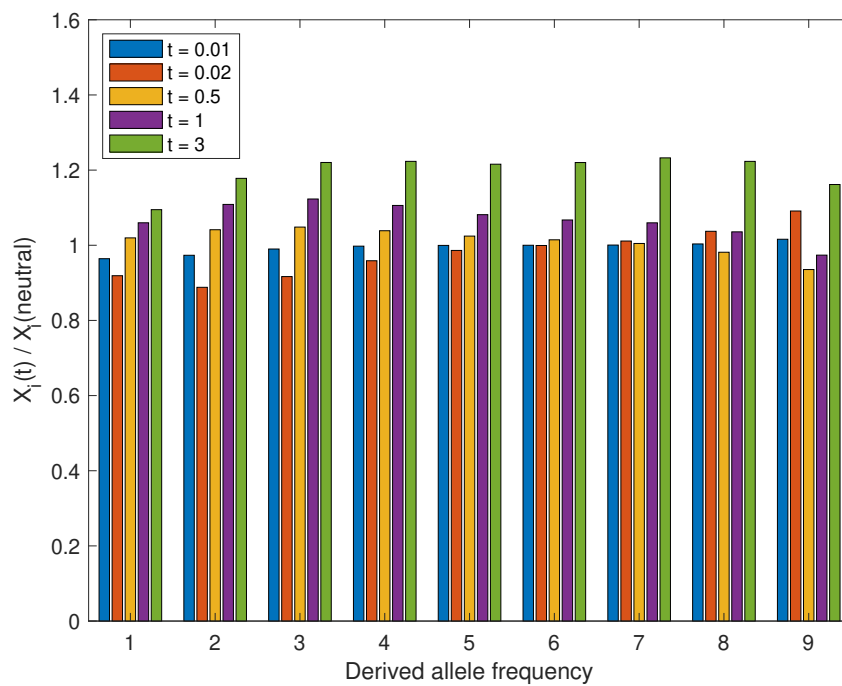

(b)

Figure S9: The SFS for the balancing selection models considered in Figure S7. In (a)  $\hat{p}_2 = 0.5$  and in (b)  $\hat{p}_2 = 0.25$ .

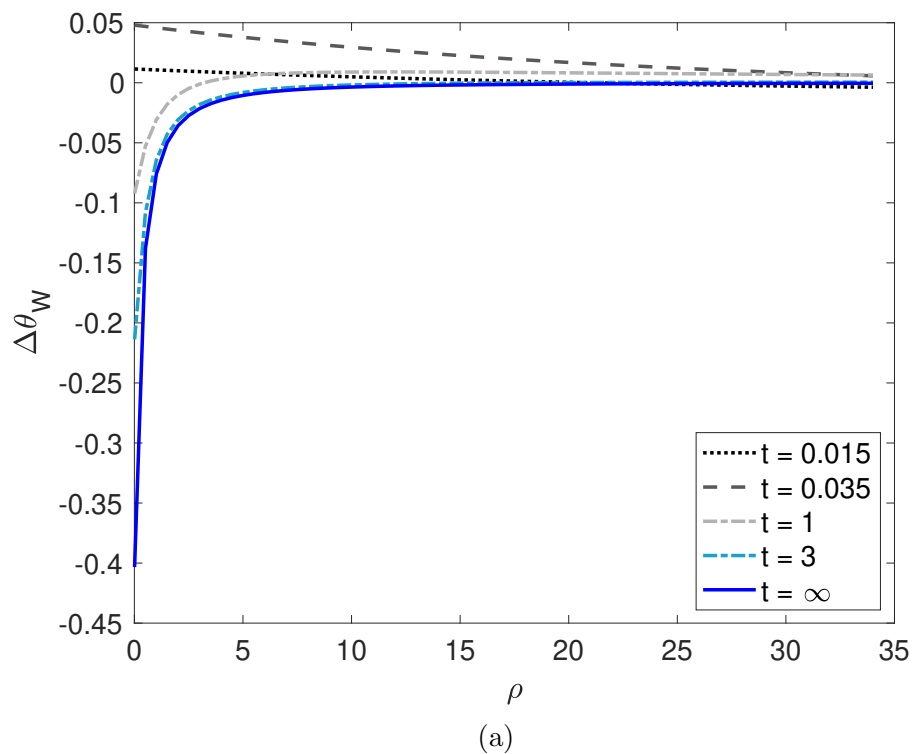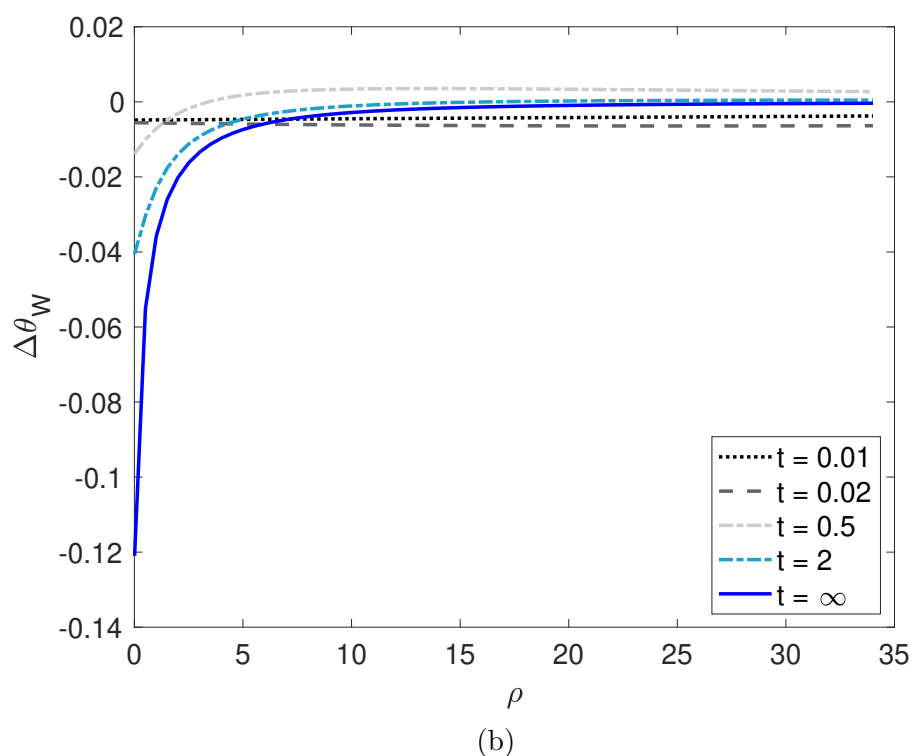

Figure S10:  $\Delta\theta_W$  as a function of  $\rho$  and  $t$  for the balancing selection models considered in Figure S7. The sample size is 10. In (a)  $\hat{p}_2 = 0.5$  and in (b)  $\hat{p}_2 = 0.25$ .
